# Supplementary material for: Assessment of the societal and individual preferences for fertility treatment in Australia: study protocol for stated preference discrete choice experiments
Source: PubMed Central journal article supplement — BMJ Open. 2018 Feb 14;8(2):e020509. doi: 10.1136/bmjopen-2017-020509 (PMC5829889; doi:10.1136/bmjopen-2017-020509), 2018-02-14
Supplement: bmjopen-2017-020509.draft_revisions.pdf [file bmjopen-2017-020509.draft_revisions.pdf]

# BMJ Open

BMJ Open is committed to open peer review. As part of this commitment we make the peer review history of every article we publish publicly available.

When an article is published we post the peer reviewers' comments and the authors' responses online. We also post the versions of the paper that were used during peer review. These are the versions that the peer review comments apply to.

The versions of the paper that follow are the versions that were submitted during the peer review process. They are not the versions of record or the final published versions. They should not be cited or distributed as the published version of this manuscript.

BMJ Open is an open access journal and the full, final, typeset and author-corrected version of record of the manuscript is available on our site with no access controls, subscription charges or pay-per-view fees (<http://bmjopen.bmj.com>).

If you have any questions on BMJ Open's open peer review process please email [editorial.bmjopen@bmj.com](mailto:editorial.bmjopen@bmj.com)

# BMJ Open

## An assessment of the societal and individual preferences for fertility treatment in Australia: study protocol for stated preference discrete choice experiments

|                               |                                                                                                                                                                                                                                                                                                                                                                                                                                                                                                                                                                                                       |
|-------------------------------|-------------------------------------------------------------------------------------------------------------------------------------------------------------------------------------------------------------------------------------------------------------------------------------------------------------------------------------------------------------------------------------------------------------------------------------------------------------------------------------------------------------------------------------------------------------------------------------------------------|
| Journal:                      | <i>BMJ Open</i>                                                                                                                                                                                                                                                                                                                                                                                                                                                                                                                                                                                       |
| Manuscript ID                 | bmjopen-2017-020509                                                                                                                                                                                                                                                                                                                                                                                                                                                                                                                                                                                   |
| Article Type:                 | Protocol                                                                                                                                                                                                                                                                                                                                                                                                                                                                                                                                                                                              |
| Date Submitted by the Author: | 07-Nov-2017                                                                                                                                                                                                                                                                                                                                                                                                                                                                                                                                                                                           |
| Complete List of Authors:     | Botha, Willings; University of New South Wales - Randwick Campus, Centre for Big Data Research in Health and School of Women's and Children's Health<br>Donnolley, Natasha; University of New South Wales - Randwick Campus, Centre for Big Data Research in Health and School of Women's and Children's Health<br>Shanahan , Marian Shanahan ; University of New South Wales - Randwick Campus, National Drug and Alcohol Research Centre<br>Chambers, Georgina; University of New South Wales - Randwick Campus, Centre for Big Data Research in Health and School of Women's and Children's Health |
| Keywords:                     | REPRODUCTIVE MEDICINE, infertility, Stated preference discrete choice experiment, willingness to pay                                                                                                                                                                                                                                                                                                                                                                                                                                                                                                  |
|                               |                                                                                                                                                                                                                                                                                                                                                                                                                                                                                                                                                                                                       |

SCHOLARONE™  
Manuscripts

Only

1  
2  
3 **An assessment of the societal and individual preferences for fertility treatment in**  
4 **Australia: study protocol for stated preference discrete choice experiments**  
5

6 *Willings Botha<sup>1</sup>, Natasha Donnelly<sup>1</sup>, Marian Shanahan<sup>2</sup>, Georgina Chambers<sup>1</sup>*

8 <sup>1</sup>The National Perinatal Epidemiology and Statistics Unit, Centre for Big Data Research in Health, School of  
9 Women's and Children's Health, University of New South Wales, Level 1 AGSM Building, Sydney 2052,  
10 Australia  
11

12 <sup>2</sup>National Drug and Alcohol Research Centre, University of New South Wales, Sydney 2052, Australia.  
13

14  
15 **Correspondence to: Dr Willings Botha; w.botha@unsw.edu.au**  
16

17 **Abstract**  
18

19 **Introduction**  
20

21  
22 In Australia, societal and individual preferences for funding fertility treatment remain largely  
23 unknown. This has resulted in a lack of evidence about willingness to pay (WTP) for fertility  
24 treatment by either the general population (the funders) or infertile individuals (who directly  
25 benefit). Using a stated preference discrete choice experiment (SPDCE) approach has been  
26 suggested as a more appropriate method to inform economic evaluations of fertility  
27 treatment.  
28  
29

30  
31  
32 We outline the protocol for an ongoing study which aims to assess fertility treatment  
33 preferences of both the general population and infertile individuals and indirectly estimate  
34 their WTP for fertility treatment.  
35  
36

37 **Methods and analysis**  
38

39  
40 Two separate but related SPDCEs will be conducted for two population samples — the  
41 general population and infertile individuals — to elicit preferences for fertility treatment to  
42 indirectly estimate willingness to pay. We describe the qualitative work to be undertaken to  
43 design the SPDCEs. We will use D-efficient fractional experimental designs informed by  
44 prior coefficients from the pilot surveys. The mode of administration for the SPDCE is also  
45 discussed. The final results will be analysed using mixed logit (MXL) or latent class (LC)  
46 models.  
47  
48  
49  
50

51 **Ethics and dissemination**  
52

53  
54 This study is being funded by the Australian National Health and Medical Research Council  
55 (NHMRC) project grant AP1104543 and has been approved by the University of New South  
56  
57

1  
2  
3 Wales Human Research Ethics Committee (HEC 17255) and a fertility clinic's Ethics  
4 Committee. Findings of the study will be disseminated in peer-reviewed journals and  
5 presented at various conferences. A lay summary of the results will be made publicly  
6 available on the UNSW National Perinatal Epidemiology and Statistics Unit (NPESU)  
7 website. Our results will contribute to the development of an evidence-based policy  
8 framework for the provision of cost-effective and patient-centred fertility treatment in  
9 Australia.  
10  
11  
12  
13  
14  
15  
16  
17  
18  
19  
20  
21  
22  
23  
24  
25  
26  
27  
28  
29  
30  
31  
32  
33  
34  
35  
36  
37  
38  
39  
40  
41  
42  
43  
44  
45  
46  
47  
48  
49  
50  
51  
52  
53  
54  
55  
56  
57  
58  
59  
60

### Strengths and limitations of this study

- To our knowledge, this study will be the first to measure and quantify preferences for fertility treatment for the general population and infertile individuals in Australia.
- The study design is unique and capable of eliciting preferences from both the general population and individuals experiencing fertility treatment.
- The results will contribute to the development of an evidence-based policy framework for the provision of cost-effective and patient-centred fertility treatment in Australia.
- The SPDCE surveys will be undertaken in Australia, which could affect generalisability to other settings.

### Introduction

One in six couples suffer infertility, causing significant personal suffering to possibly more than 50 million couples worldwide<sup>1 2 3</sup>. Rates of infertility are predicted to increase with the trend to postpone childbearing, deteriorating sperm quality, and rising rates of obesity and some sexually transmitted diseases<sup>4</sup>.

Economic evaluations that consider outcomes of fertility treatment are scarce, mainly because the unique objective of fertility treatment is to create new life rather than extend or improve health-related quality of life (HRQoL), unlike other forms of medical care<sup>5</sup>. The outcomes of fertility treatment are also broader than those traditionally considered in healthcare and include substantial non-health related, such as family formation, existential meaning, and individual identity. Furthermore, process outcomes related to delivery of treatment, such as continuity of care, joint decision making, and convenience, are also important drivers of satisfaction with treatment<sup>6-11</sup>.

These multiple and varied outcomes do not usually have a market price and cannot all be captured and valued in a conventional quality-adjusted life year (QALY) framework<sup>12-17</sup>. Fertility treatment involves multiple stakeholders, including the mother, father, donor, and society, which further makes the QALY measure unsuitable<sup>12 13 18-22</sup>. Despite supportive public funding of fertility treatment in Australia through its universal health insurance scheme (Medicare), societal and individual preferences for funding fertility treatment remain largely unknown. This results in a lack of evidence about willingness to pay (WTP) for fertility treatment by either the general population (the indirect funders through tax

1  
2  
3 contribution) or infertile individuals (who directly benefit). Without estimates of the shadow  
4 price for fertility treatment, as expressed by WTP estimates, the economic value of fertility  
5 treatment and its cost-effectiveness are lacking to inform policy and resource allocation  
6 decision-making<sup>12</sup>.  
7  
8

9  
10 Using stated preference discrete choice experiment (SPDCE) has been suggested as an  
11 appropriate method for evaluating broad outcomes of fertility treatment in monetary terms<sup>13</sup>  
12<sup>16 23 24</sup>. This approach indirectly elicits willingness to pay (WTP) estimates for any treatment  
13 attributes (characteristics) without being restricted to health outcomes alone.  
14  
15

16  
17  
18 We outline a unique design of two separate but related SPDCEs to elicit treatment  
19 preferences from the general population and infertile individuals to indirectly estimate WTP  
20 values for the attributes and levels of fertility treatment. To our knowledge, this study will be  
21 the first to measure and quantify preferences for fertility treatment for both the general  
22 population and infertile individuals.  
23  
24  
25

## 26 27 **Aims**

28  
29 The specific objectives of the study are to assess WTP values for fertility treatment from the  
30 general population and infertile individuals. The study will determine whether:  
31  
32

- 33 1. The current level of Medicare expenditure for fertility treatment in Australia is in line  
34 with the general population's and individuals' WTP for the treatment;
- 35 2. The general population's WTP for fertility treatment varies by patient characteristics  
36 and family structures.
- 37 3. The general population's and patients' WTP for fertility treatment can be influenced  
38 by the attributes of treatment.  
39  
40  
41  
42  
43  
44

## 45 **Methods and analysis**

### 46 47 **Overview of SPDCE approach**

48  
49 The SPDCE approach is an attribute-based measure of value which can capture broader  
50 aspects of an intervention, including outcomes not related to health, and process outcomes  
51 related to delivery of treatment<sup>25</sup>. SPDCEs have a theoretical basis on Random Utility  
52 Theory (RUT) which assumes that individuals value an intervention based on the bundle of  
53 its attributes as a whole<sup>26</sup> and that they prefer an intervention that gives them the highest level  
54  
55  
56  
57  
58  
59  
60

1  
2  
3 of satisfaction based on the individual attributes<sup>27</sup>. In a SPDCE, respondents are presented  
4 with specially designed hypothetical scenarios of treatment programs where at least one  
5 attribute of the treatment is varied systematically in terms of its levels. Individuals are asked  
6 to choose an option they prefer, including an 'opt-out'. The extent to which respondents  
7 'trade-off' one set of attributes against one another is assessed through logistic regression  
8 models<sup>28 29</sup>. The dependent variable in the model represents the likelihood of choosing one  
9 alternative with specific attributes and levels over another. The independent variables are the  
10 attributes and levels of treatment. Heterogeneity can be accounted for using covariates or  
11 their specification in a mixed logit (MXL) or latent class (LC) models<sup>30 31 32</sup>. When a cost  
12 attribute is included, it is possible to indirectly estimate WTP values for particular attributes  
13 of treatment<sup>23 25 33 34</sup>.

21 Crucial to the SPDCE process is the conduct of the following five stages: 1) identification of  
22 attributes for fertility treatment; 2) assignment of levels to these attributes; 3) development of  
23 an experimental design to define the choice alternatives to be presented to respondents; 4)  
24 development and administration of questionnaires to collect data; and 5) data input and  
25 analysis of responses from the surveys<sup>32 35-37</sup>. In the following section, we summarise the  
26 steps involved in our planned SPDCE.

### 33 **Qualitative component to inform the development of attributes and levels**

35 The attributes and levels of the SPDCEs will be developed based on a qualitative component  
36 of the study, which includes a literature review and focus group discussions (FGDs)<sup>36 38-43</sup>.  
37 The latter will involve two distinct sample groups: general population and infertile  
38 individuals (n=8-16), respectively. The general population will be recruited using a poster  
39 advertisement placed on notice-boards in public places such as shopping centres and libraries,  
40 and an online classified advertisement placed on social media and advertising websites such  
41 as 'Gumtree'. Infertile individuals will be recruited from a fertility clinic in Sydney through a  
42 poster advertisement which will be placed in the clinic. These participants will be a mix of  
43 those who are considering, currently using, or have previously used fertility treatment.

50 For both population groups, individuals who are interested in participating in the FGD are  
51 asked to respond to the study advertisements by contacting the research team through email  
52 or telephone for more information. Following contact, a member of the research team will  
53 provide additional information on the purpose of the FGDs to ensure participants have  
54  
55  
56  
57

adequate knowledge and understand what their participation would involve. At the same time, potential participants will be screened for eligibility. All participants must be aged 18 years or older, able to speak English, Australian citizens or residents, and with the ability to provide consent. There are no eligibility criteria related to gender or marital status. If they meet the set inclusion criteria, prospective participants will be asked to provide an email address for the researchers to send them an invitation with the details of the FGD and the Participant Information Sheet and Consent Form (PISCF). Both FGDs will be facilitated by two researchers and will last approximately 1-1.5 hours. The discussions will be audio recorded and later transcribed without any identifying information.

The FGDs will use a Nominal Group Technique (NGT)<sup>42 44-46</sup> where a facilitator will ask participants to think about the important features of fertility treatment and whether the way it is provided might matter to them or other individuals when choosing one fertility treatment over another. Participants will be asked to silently generate a list of the attributes of fertility treatment. One participant at a time will be asked to state a single attribute to the group which will be recorded verbatim on a whiteboard. This process will continue until saturation after which attributes will be clarified and similar attributes grouped together by FGD participants. Following this, participants will be asked to rank order the identified attributes privately based on personal preferences for the attributes. In case the cost attribute is not identified during the FGDs, it will, nevertheless, be included to allow the indirect estimation of willingness to pay (WTP) through marginal rate of substitution (MRS)<sup>33 47-50</sup>.

### **Selection of attributes and levels for the SPDCE**

A comprehensive list of potential attributes and levels from this qualitative work will be broadly categorised into two groups: attributes related to the outcomes of treatment; and attributes related to the process, delivery or provision of treatment<sup>6 7 11 51-55</sup>. A consensus group of experts in fertility treatment will help synthesise the attributes, assign levels to the attributes (where they were not identified by the FGDs) and refine the wording for clarity. The number of attributes to include in the SPDCE model will be limited to eight each with two to four levels based on the rules-of-thumb used in many studies<sup>35 41 56-58</sup>. Using too many attributes and levels increases the complexity of the choice tasks for respondents which may result in individuals not trading-off the attributes or in respondent fatigue<sup>59 60</sup>.



### SPDCE design

The consolidated attributes and levels of fertility treatment will be used in the initial orthogonal fractional experimental design. This will define the choice alternatives for a pilot survey of both the general population and infertile individuals<sup>50</sup>. This design will have no prior information about preferences for fertility treatment.<sup>50</sup> Subsequently, the coefficients from the pilot surveys will be used as prior information to inform the construction of optimal or efficient fractional experimental designs for the final surveys of the two sample groups<sup>58 61 62</sup>. The SPDCE designs will be unlabelled<sup>35 63 64</sup> and will follow design principles stipulated by Huber and Zwerina<sup>65</sup>. Ngene software will be used for constructing experimental designs<sup>66</sup>.

### Questionnaire development and administration

The choice tasks in the SPDCE questionnaire for the pilot surveys will be similar for the two sample groups, developed using the output of the fractional experimental designs without prior information on preferences. These choice tasks will differ in the final surveys as they will be built using the coefficients obtained from the results of the pilot surveys, which will differ between the two groups. The format of the questionnaire will follow guidelines which suggest the provision of an introduction; an explanation of the context of the survey, the attributes and their levels; an example of the choice task; an emphasis on respondents' time commitment and the importance of their participation and confidentiality<sup>50</sup>. Respondents will be guided on where to direct any queries on the survey and how to proceed answering the choices questions. The questionnaire will also include additional follow-up questions which will include an evaluation of the level of difficulty of the choice tasks on a five-point scale of very easy, easy, ok, difficult and very difficult; and respondents' socio-demographic characteristics.

The SPDCE questionnaire will be tested for face and theoretical validity. Face validity will be done with a small group of individuals to refine the phrasing and comprehension, while theoretical validity will be explored in the pilot surveys through sign and significance of the parameter estimates to ensure that they conform to a priori expectations, especially for the time or cost attribute which would normally show a monotonic relationship<sup>67</sup>. Two additional choice sets will also be included to act as consistency and reliability checks<sup>57 67 68</sup>. A consistency check is a theoretically dominant choice set on attribute-levels which is used to

1  
2  
3 test the rationality of the respondents, while a reliability check is simply a re-insertion of a  
4 choice set from the experimental design to somewhere later in the design.  
5

### 6 **Sampling and recruitment**

7  
8  
9 Sample size calculation in SPDCE studies has not been fully developed, with most studies  
10 still using the 'rules-of-thumb' or relying on the use of efficient experimental designs. This  
11 has the potential benefit of reducing confidence intervals of parameter estimates in a SPDCE  
12 model, hence permitting the use of reduced sample sizes<sup>58 69-71</sup>.  
13  
14

15  
16 A sample size of 20 respondents has been suggested as adequate to be able to estimate a  
17 SPDCE model<sup>35</sup>. Previous studies have generally shown that sample sizes of 40-100  
18 respondents may be sufficient for reliable statistical analysis<sup>72</sup>. Orme<sup>70</sup> proposes a total of  
19 300 respondents for robust quantitative research and a minimum of 200 per group for  
20 subgroup analysis. This study will benefit both from using sample sizes well above the rules-  
21 of-thumb and efficient experimental designs for the final surveys, in order to have robust  
22 results.  
23  
24  
25  
26

27  
28 All surveys will be administered online with a sample size of 30 participants for pilot surveys  
29 of the general population and infertile individuals, respectively. Participants for both pilot  
30 surveys will be recruited using the same methods as used for the FDGs. For the two samples,  
31 interested participants will respond to the study advertisements by contacting researchers  
32 either by email or phone. Following screening for eligibility, potential participants will be  
33 emailed a survey invitation and Participant Information Sheet and Consent Form (PISCF)  
34 with a link to the online pilot survey. By completing and submitting the survey, participants  
35 will be providing their consent.  
36  
37  
38  
39  
40

41  
42 The final survey for the general population will be administered by a commercial survey  
43 company, recruiting 3000 participants from a panel of the Australian population. Recruitment  
44 of infertile individuals will be through a fertility organisation's clinics and a national  
45 infertility consumer organisation (n=250-300). Interested individuals will respond to the  
46 study advertisements by email or telephone and will be emailed the invitation and PISCF  
47 with a link to an online survey. Clicking on a link within the consent form will imply consent  
48 to start the survey and they can withdraw at any time. Full consent will be deemed after they  
49 complete and submit the entire survey.  
50  
51  
52  
53  
54  
55  
56  
57  
58  
59  
60

## Data analysis plan

The responses from the SPDCE surveys will initially be analysed using logistic regression with a multinomial logit (MNL) model in Stata or Nlogit software. To estimate WTP, the results of a mixed logit (MXL) or latent class (LC) models which account for preference heterogeneity will be used. The success rate, time and cost attributes of fertility treatment will be modelled as continuous variables in order to apply the MRS. Differences in preferences between individual groups will be explored through the interaction between the attributes or levels and the socio-demographic characteristics. Figure 1 presents a flowchart of activities for our study:

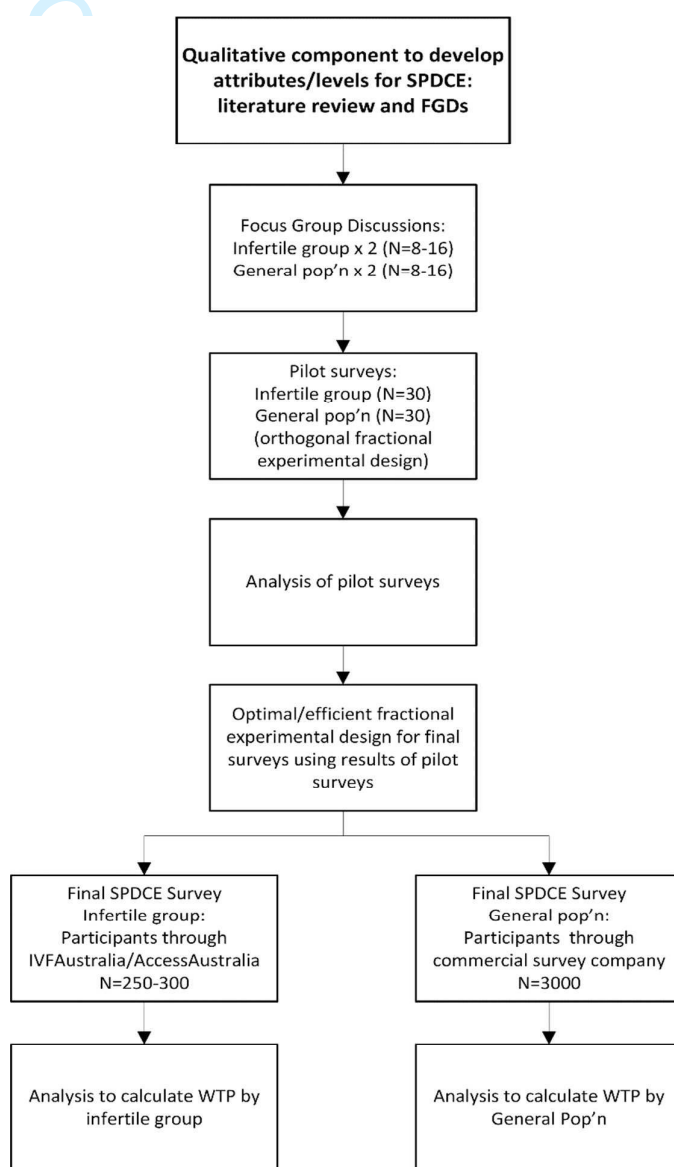

Figure 1: A flowchart of activities

### **Ethics and dissemination**

The ethics approval was obtained from the University of New South Wales Human Research Ethics Committee (HEC 17255) and a fertility clinic's Ethics Committee. All participants will be provided with a Participant Information Sheet and Consent Form (PISCF) before undertaking any study activity. There will be no incentive payment of any form to participants. Findings of the study will be disseminated in peer-reviewed journals and presented at various conferences. A lay summary of the results will be made available publicly on the UNSW National Perinatal Epidemiology and Statistics Unit (NPESU) website. The results will be used to contribute to the development of an evidence-based policy framework for the provision of cost-effective and patient-centred fertility treatments in Australia.

### **Author affiliations**

<sup>1</sup> The National Perinatal Epidemiology and Statistics Unit, Centre for Big Data Research in Health, School of Women's and Children's Health, University of New South Wales, Level 1 AGSM Building, Sydney 2052, Australia

<sup>2</sup> National Drug and Alcohol Research Centre, University of New South Wales, Sydney 2052, Australia.

**Contributors** GC and MS wrote the grant application. WB wrote the first draft of the protocol. WB, ND, MS and GC contributed to the drafting and editing of the protocol and approved the final version.

**Funding** This study is being funded by the Australian National Health and Medical Research Council (NHMRC) project grant AP1104543.

**Competing interests** None declared.

**Ethics approval** University of New South Wales Human Research Ethics Committee (HEC 17255).

**Provenance and peer review** Not commissioned; externally peer reviewed.

**Open Access** This is an Open Access article distributed in accordance with the Creative Commons Attribution Non Commercial (CC BY-NC 4.0) license, which permits others to distribute, remix, adapt, build upon this work noncommercially, and license their derivative works on different terms, provided the original work is properly cited and the use is non-commercial. See: <http://creativecommons.org/licenses/by-nc/4.0/>.

## References

1. Mascarenhas MN, Flaxman SR, Boerma T, et al. National, regional, and global trends in infertility prevalence since 1990: a systematic analysis of 277 health surveys. *PLoS medicine* 2012;9(12):e1001356.
2. Boivin J, Bunting L, Collins JA, et al. International estimates of infertility prevalence and treatment-seeking: potential need and demand for infertility medical care. *Human reproduction* 2007;22(6):1506-12.
3. Labett Research and Marketing. Fertility study: attitudes, experiences and behaviours of Australian general public. Lower Hutt, New Zealand: Fertility Society of Australia, 2006.
4. Sharma R, Biedenharn KR, Fedor JM, et al. Lifestyle factors and reproductive health: taking control of your fertility. *Reproductive Biology and Endocrinology* 2013;11(1):66.
5. Connolly MP, Hoorens S, Chambers GM. The costs and consequences of assisted reproductive technology: an economic perspective. *Human Reproduction Update* 2010;16(6):603-13.
6. Aarts JWM, Huppelschoten AG, van Empel IWH, et al. How patient-centred care relates to patients' quality of life and distress: a study in 427 women experiencing infertility. *Human Reproduction* 2012;27(2):488-95. doi: 10.1093/humrep/der386
7. van Empel IWH, Aarts JWM, Cohlen BJ, et al. Measuring patient-centredness, the neglected outcome in fertility care: a random multicentre validation study. *Human Reproduction* 2010;25(10):2516-26. doi: 10.1093/humrep/deq219
8. Cousineau TM, Green TC, Corsini E, et al. Online psychoeducational support for infertile women: a randomized controlled trial. *Human Reproduction* 2008;23(3):554-66.
9. van Empel IWH, Nelen WLDM, Tepe ET, et al. Weaknesses, strengths and needs in fertility care according to patients. *Human Reproduction* 2010;25(1):142-49. doi: 10.1093/humrep/dep362
10. Dancet EAF, D'Hooghe TM, Sermeus W, et al. Patients from across Europe have similar views on patient-centred care: an international multilingual qualitative study in infertility care. *Human Reproduction* 2012;27(6):1702-11. doi: 10.1093/humrep/des061
11. Mourad SM, Nelen WLDM, Akkermans RP, et al. Determinants of patients' experiences and satisfaction with fertility care. *Fertility and Sterility* 2010;94(4):1254-60. doi: <http://dx.doi.org/10.1016/j.fertnstert.2009.07.990>
12. Baird D, Barri P, Bhattacharya S, et al. Economic aspects of infertility care: a challenge for researchers and clinicians. *Human Reproduction* 2015:dev163.
13. Devlin N, Parkin D. Funding fertility: issues in the allocation and distribution of resources to assisted reproduction technologies. *Human Fertility* 2003;6(sup2):S2-S6.
14. Ryan M. Should government fund assisted reproductive techniques? A study using willingness to pay. *Applied Economics* 1997;29(7):841-49.
15. Connolly MP, Hoorens S, Chambers GM. The costs and consequences of assisted reproductive technology: an economic perspective. *Human reproduction update* 2010:dmq013.
16. van den Wijngaard L, Rodijk I, van der Veen F, et al. Patient preference for a long-acting recombinant Fsh product in ovarian hyperstimulation in Ivf: a discrete choice experiment. *Human reproduction (oxford, England)* 2015;30(2):331-37.
17. Johnston RJ, Boyle KJ, Adamowicz W, et al. Contemporary Guidance for Stated Preference Studies. *Journal of the Association of Environmental and Resource Economists* 2017;4(2):319-405. doi: doi:10.1086/691697

18. Scotland G, McLernon D, Kurinczuk J, et al. Minimising twins in in vitro fertilisation: a modelling study assessing the costs, consequences and cost-utility of elective single versus double embryo transfer over a 20-year time horizon. *BJOG: An International Journal of Obstetrics & Gynaecology* 2011;118(9):1073-83.
19. Ratcliffe J. The economics of the IVF programme: a critical review: Citeseer 1992.
20. Goldhaber-Fiebert JD, Brandeau ML. Evaluating cost-effectiveness of interventions that affect fertility and childbearing: how health effects are measured matters. *Medical Decision Making* 2015;35(7):818-46.
21. Versteegh M, Brouwer W. Patient and general public preferences for health states: a call to reconsider current guidelines. *Social Science & Medicine* 2016;165:66-74.
22. Dolan P, Edlin R. Is it really possible to build a bridge between cost-benefit analysis and cost-effectiveness analysis? *Journal of Health Economics* 2002;21(5):827-43.
23. Ryan M. Using conjoint analysis to take account of patient preferences and go beyond health outcomes: an application to in vitro fertilisation. *Social Science & Medicine* 1999;48(4):535-46. doi: [http://dx.doi.org/10.1016/S0277-9536\(98\)00374-8](http://dx.doi.org/10.1016/S0277-9536(98)00374-8)
24. Musters AM, de Bekker-Grob EW, Mochtar MH, et al. Women's perspectives regarding subcutaneous injections, costs and live birth rates in IVF. *Human reproduction* 2011;26(9):2425-31.
25. Tockhorn-Heidenreich A, Ryan M, Hernández R. Discrete Choice Experiments. In: Facey KM, Ploug Hansen H, Single ANV, eds. Patient Involvement in Health Technology Assessment. Singapore: Springer Singapore 2017:121-33.
26. Lancaster KJ. A new approach to consumer theory. *The journal of political economy* 1966;74(2):132-57.
27. McFadden D. Conditional logit analysis of qualitative choice behavior. *Frontiers of econometrics* 1974(Zarembka P Edition):105-42.
28. Ryan M, Gerard K, Amaya-Amaya M. Discrete Choice Experiments in a Nutshell. In: Ryan M, Gerard K, Amaya-Amaya M, eds. Using Discrete Choice Experiments to Value Health and Health Care: Springer Netherlands 2008:13-46.
29. Hanley N, Wright RE, Alvarez-Farizo B. Estimating the economic value of improvements in river ecology using choice experiments: an application to the water framework directive. *Journal of Environmental Management* 2006;78(2):183-93. doi: <http://dx.doi.org/10.1016/j.jenvman.2005.05.001>
30. Spinks J, Chaboyer W, Bucknall T, et al. Patient and nurse preferences for nurse handover—using preferences to inform policy: a discrete choice experiment protocol. *BMJ open* 2015;5(11):e008941.
31. Goossens LM, Utens CM, Smeenk FW, et al. Should I stay or should I go home? A latent class analysis of a discrete choice experiment on hospital-at-home. *Value in Health* 2014;17(5):588-96.
32. Lancsar E, Fiebig DG, Hole AR. Discrete Choice Experiments: A Guide to Model Specification, Estimation and Software. *PharmacoEconomics* 2017:1-20.
33. Ryan M, Kolstad J, Rockers P, et al. How to conduct a Discrete Choice Experiment for health workforce recruitment and retention in remote and rural areas: a user guide with case studies. CapacityPlus World Bank and World Health Organization 2012.
34. McIntosh E, Clarke P, Frew E, et al. Applied Methods of Cost-Benefit Analysis in Health Care: Oxford University Press, 2010.
35. Lancsar E, Louviere J. Conducting Discrete Choice Experiments to Inform Healthcare Decision Making. *PharmacoEconomics* 2008;26(8):661-77.
36. Kløjgaard ME, Bech M, Søgaard R. Designing a Stated Choice Experiment: The Value of a Qualitative Process. *Journal of Choice Modelling* 2012;5(2):1-18. doi: [http://dx.doi.org/10.1016/S1755-5345\(13\)70050-2](http://dx.doi.org/10.1016/S1755-5345(13)70050-2)

- 1
- 2
- 3 37. Louviere JJ, Hensher DA, Swait JD. Stated choice methods: analysis and applications:  
4 Cambridge University Press 2000.
- 5 38. Coast J, Al-Janabi H, Sutton EJ, et al. Using qualitative methods for attribute  
6 development for discrete choice experiments: issues and recommendations. *Health*  
7 *Economics* 2012;21(6):730-41. doi: 10.1002/hec.1739
- 8 39. Guttman R, Castle R, Fiebig DG. Use of discrete choice experiments in health  
9 economics: An update of the literature. CHERE WORKING PAPER 2009/2 2009.
- 10 40. Kragt ME. Evidence-based Research in Environmental Choice Experiments. Working  
11 Paper 1310. Australia: School of Agricultural and Resource Economics, University of  
12 Western Australia, 2013.
- 13 41. Bridges JFP, Hauber AB, Marshall D, et al. Conjoint Analysis Applications in Health—a  
14 Checklist: A Report of the ISPOR Good Research Practices for Conjoint Analysis  
15 Task Force. *Value in Health* 2011;14(4):403-13. doi:  
16 <http://dx.doi.org/10.1016/j.jval.2010.11.013>
- 17 42. Hilgsmann M, van Durme C, Geusens P, et al. Nominal group technique to select  
18 attributes for discrete choice experiments: an example for drug treatment choice in  
19 osteoporosis. *Patient preference and adherence* 2013;7:133.
- 20 43. Vass C, Rigby D, Payne K. The Role of Qualitative Research Methods in Discrete Choice  
21 Experiments. *Medical Decision Making* 2017:0272989X16683934. doi:  
22 10.1177/0272989X16683934
- 23 44. Harvey N, Holmes CA. Nominal group technique: An effective method for obtaining  
24 group consensus. *International Journal of Nursing Practice* 2012;18(2):188-94. doi:  
25 10.1111/j.1440-172X.2012.02017.x
- 26 45. Kremer IEH, Evers SMAA, Jongen PJ, et al. Identification and Prioritization of Important  
27 Attributes of Disease-Modifying Drugs in Decision Making among Patients with  
28 Multiple Sclerosis: A Nominal Group Technique and Best-Worst Scaling. *PLOS ONE*  
29 2016;11(11):e0164862. doi: 10.1371/journal.pone.0164862
- 30 46. McMillan SS, King M, Tully MP. How to use the nominal group and Delphi techniques.  
31 *International journal of clinical pharmacy* 2016;38(3):655-62.
- 32 47. Carlsson F. Non-Market Valuation: Stated Preference Methods: 'Oxford University Press'  
33 2011.
- 34 48. Greiner R, Bliemer M, Ballweg J. Design considerations of a choice experiment to  
35 estimate likely participation by north Australian pastoralists in contractual  
36 biodiversity conservation. *Journal of Choice Modelling* 2014;10:34-45.
- 37 49. Ryan M, Gerard K, Watson V, et al. Practical Issues in Conducting a Discrete Choice  
38 Experiment. In: Ryan M, Gerard K, Amaya-Amaya M, eds. *Using Discrete Choice*  
39 *Experiments to Value Health and Health Care*: Springer Netherlands 2008:73-97.
- 40 50. Hensher DA, Rose JM, Greene WH. *Applied Choice Analysis*. Second ed. United  
41 Kingdom: Cambridge University Press 2015.
- 42 51. van Empel IWH, Dancet EAF, Koolman XHE, et al. Physicians underestimate the  
43 importance of patient-centredness to patients: a discrete choice experiment in fertility  
44 care. *Human Reproduction* 2011;26(3):584-93. doi: 10.1093/humrep/deq389
- 45 52. Dancet EAF, Nelen WLD, Sermeus W, et al. The patients' perspective on fertility care:  
46 a systematic review. *Human Reproduction Update* 2010;16(5):467-87. doi:  
47 10.1093/humupd/dmq004
- 48 53. Palumbo A, De La Fuente P, Rodríguez M, et al. Willingness to pay and conjoint analysis  
49 to determine women's preferences for ovarian stimulating hormones in the treatment  
50 of infertility in Spain. *Human reproduction* 2011:der139.
- 51 54. Porter R, Kissel C, Saunders H, et al. Patient and nurse evaluation of recombinant human  
52 follicle-stimulating hormone administration methods: comparison of two follitropin  
53  
54  
55  
56  
57

- 1  
2  
3 injection pens. *Current Medical Research and Opinion* 2008;24(3):727-35. doi:  
4 10.1185/030079908X273291
- 5 55. Dancet EAF, D'Hooghe TM, Spiessens C, et al. Quality indicators for all dimensions of  
6 infertility care quality: consensus between professionals and patients. *Human*  
7 *Reproduction* 2013;28(6):1584-97. doi: 10.1093/humrep/det056
- 8 56. Pfarr C, Schmid A, Schneider U. Using Discrete Choice Experiments to Understand  
9 Preferences in Health Care. *Health Care Provision and Patient Mobility: Health*  
10 *Integration in the European Union* 2014:27-48.
- 11 57. Kjær T. A review of the discrete choice experiment-with emphasis on its application in  
12 health care: Syddansk Universitet Denmark 2005.
- 13 58. Rose JM, Bliemer MC. Constructing efficient stated choice experimental designs.  
14 *Transport Reviews* 2009;29(5):587-617.
- 15 59. Lloyd AJ. Threats to the estimation of benefit: are preference elicitation methods  
16 accurate? *Health economics* 2003;12(5):393-402.
- 17 60. de Bekker-Grob EW, Ryan M, Gerard K. Discrete choice experiments in health  
18 economics: a review of the literature. *Health Economics* 2012;21(2):145-72. doi:  
19 10.1002/hec.1697
- 20 61. Domínguez-Torreiro M. Alternative experimental design paradigms in choice  
21 experiments and their effects on consumer demand estimates for beef from  
22 endangered local cattle breeds: An empirical test. *Food Quality and Preference*  
23 2014;35:15-23.
- 24 62. Hauber AB, González JM, Groothuis-Oudshoorn CG, et al. Statistical Methods for the  
25 Analysis of Discrete Choice Experiments: A Report of the ISPOR Conjoint Analysis  
26 Good Research Practices Task Force. *Value in Health* 2016
- 27 63. Doherty E, Campbell D, Hynes S, et al. Examining labelling effects within discrete  
28 choice experiments: An application to recreational site choice. *Journal of*  
29 *Environmental Management* 2013;125(0):94-104. doi:  
30 <http://dx.doi.org/10.1016/j.jenvman.2013.03.056>
- 31 64. Hoyos D. The state of the art of environmental valuation with discrete choice  
32 experiments. *Ecological Economics* 2010;69(8):1595-603. doi:  
33 10.1016/j.ecolecon.2010.04.011
- 34 65. Huber J, Zwerina K. The importance of utility balance in efficient choice designs. *Journal*  
35 *of Marketing research* 1996:307-17.
- 36 66. Chocometrics. Ngene 1.1.2: User manual and reference guide: Choice Metrics Pty Ltd,  
37 2014.
- 38 67. Ryan M, Major K, Skåtun D. Using discrete choice experiments to go beyond clinical  
39 outcomes when evaluating clinical practice. *Journal of evaluation in clinical practice*  
40 2005;11(4):328-38.
- 41 68. Carlsson F, Mørkbak MR, Olsen SB. The first time is the hardest: A test of ordering  
42 effects in choice experiments. *Journal of Choice Modelling* 2012;5(2):19-37. doi:  
43 [http://dx.doi.org/10.1016/S1755-5345\(13\)70051-4](http://dx.doi.org/10.1016/S1755-5345(13)70051-4)
- 44 69. Efficiency benefits of choice model experimental design updating: a case study. 2009  
45 Conference (53rd), February 11-13, 2009, Cairns, Australia; 2009. Australian  
46 Agricultural and Resource Economics Society.
- 47 70. Orme B. Getting Started with Conjoint Analysis: Strategies for Product Design and  
48 Pricing Research Madison. *Wisconsin: Research Publishers* 2006
- 49 71. de Bekker-Grob E, Donkers B, Jonker M, et al. Sample Size Requirements for Discrete-  
50 Choice Experiments in Healthcare: a Practical Guide. *The Patient - Patient-Centered*  
51 *Outcomes Research* 2015:1-12. doi: 10.1007/s40271-015-0118-z
- 52  
53  
54  
55  
56  
57  
58  
59  
60



1  
2  
3  
4  
5  
6  
7  
8  
9  
10  
11  
12  
13  
14  
15  
16  
17  
18  
19  
20  
21  
22  
23  
24  
25  
26  
27  
28  
29  
30  
31  
32  
33  
34  
35  
36  
37  
38  
39  
40  
41  
42  
43  
44  
45  
46  
47  
48  
49  
50  
51  
52  
53  
54  
55  
56  
57  
58  
59  
60

72. de Bekker-Grob E, Bliemer M, Donkers B, et al. Patients' and urologists' preferences for prostate cancer treatment: a discrete choice experiment. *British journal of cancer* 2013;109(3):633-40.

For peer review only

# BMJ Open

## An assessment of the societal and individual preferences for fertility treatment in Australia: study protocol for stated preference discrete choice experiments

|                                 |                                                                                                                                                                                                                                                                                                                                                                                                                                                                                                                                                                                                       |
|---------------------------------|-------------------------------------------------------------------------------------------------------------------------------------------------------------------------------------------------------------------------------------------------------------------------------------------------------------------------------------------------------------------------------------------------------------------------------------------------------------------------------------------------------------------------------------------------------------------------------------------------------|
| Journal:                        | <i>BMJ Open</i>                                                                                                                                                                                                                                                                                                                                                                                                                                                                                                                                                                                       |
| Manuscript ID                   | bmjopen-2017-020509.R1                                                                                                                                                                                                                                                                                                                                                                                                                                                                                                                                                                                |
| Article Type:                   | Protocol                                                                                                                                                                                                                                                                                                                                                                                                                                                                                                                                                                                              |
| Date Submitted by the Author:   | 12-Dec-2017                                                                                                                                                                                                                                                                                                                                                                                                                                                                                                                                                                                           |
| Complete List of Authors:       | Botha, Willings; University of New South Wales - Randwick Campus, Centre for Big Data Research in Health and School of Women's and Children's Health<br>Donnolley, Natasha; University of New South Wales - Randwick Campus, Centre for Big Data Research in Health and School of Women's and Children's Health<br>Shanahan , Marian Shanahan ; University of New South Wales - Randwick Campus, National Drug and Alcohol Research Centre<br>Chambers, Georgina; University of New South Wales - Randwick Campus, Centre for Big Data Research in Health and School of Women's and Children's Health |
| <b>Primary Subject Heading</b>: | Health economics                                                                                                                                                                                                                                                                                                                                                                                                                                                                                                                                                                                      |
| Secondary Subject Heading:      | Reproductive medicine                                                                                                                                                                                                                                                                                                                                                                                                                                                                                                                                                                                 |
| Keywords:                       | REPRODUCTIVE MEDICINE, infertility, Stated preference discrete choice experiment, willingness to pay                                                                                                                                                                                                                                                                                                                                                                                                                                                                                                  |
|                                 |                                                                                                                                                                                                                                                                                                                                                                                                                                                                                                                                                                                                       |

SCHOLARONE™  
Manuscripts

# **An assessment of the societal and individual preferences for fertility treatment in Australia: study protocol for stated preference discrete choice experiments**

*Willings Botha<sup>1</sup>, Natasha Donnelly<sup>1</sup>, Marian Shanahan<sup>2</sup>, Georgina M. Chambers<sup>1</sup>*

<sup>1</sup> The National Perinatal Epidemiology and Statistics Unit, Centre for Big Data Research in Health, School of Women's and Children's Health, University of New South Wales, Level 1 AGSM Building, Sydney 2052, Australia

<sup>2</sup> National Drug and Alcohol Research Centre, University of New South Wales, Sydney 2052, Australia.

**Correspondence to: Dr Willings Botha; [w.botha@unsw.edu.au](mailto:w.botha@unsw.edu.au)**

## **Abstract**

### **Introduction**

In Australia, societal and individual preferences for funding fertility treatment remain largely unknown. This has resulted in a lack of evidence about willingness to pay (WTP) for fertility treatment by either the general population (the funders) or infertile individuals (who directly benefit). Using a stated preference discrete choice experiment (SPDCE) approach has been suggested as a more appropriate method to inform economic evaluations of fertility treatment.

We outline the protocol for an ongoing study which aims to assess fertility treatment preferences of both the general population and infertile individuals and indirectly estimate their WTP for fertility treatment.

### **Methods and analysis**

Two separate but related SPDCEs will be conducted for two population samples — the general population and infertile individuals — to elicit preferences for fertility treatment to indirectly estimate willingness to pay. We describe the qualitative work to be undertaken to design the SPDCEs. We will use D-efficient fractional experimental designs informed by prior coefficients from the pilot surveys. The mode of administration for the SPDCE is also discussed. The final results will be analysed using mixed logit (MXL) or latent class (LC) models.

### **Ethics and dissemination**

This study is being funded by the Australian National Health and Medical Research Council (NHMRC) project grant AP1104543 and has been approved by the University of New South

1  
2  
3 Wales Human Research Ethics Committee (HEC 17255) and a fertility clinic's Ethics  
4 Committee. Findings of the study will be disseminated in peer-reviewed journals and  
5 presented at various conferences. A lay summary of the results will be made publicly  
6 available on the UNSW National Perinatal Epidemiology and Statistics Unit (NPESU)  
7 website. Our results will contribute to the development of an evidence-based policy  
8 framework for the provision of cost-effective and patient-centred fertility treatment in  
9 Australia.  
10  
11  
12  
13  
14  
15  
16  
17  
18  
19  
20  
21  
22  
23  
24  
25  
26  
27  
28  
29  
30  
31  
32  
33  
34  
35  
36  
37  
38  
39  
40  
41  
42  
43  
44  
45  
46  
47  
48  
49  
50  
51  
52  
53  
54  
55  
56  
57  
58  
59  
60

For peer review only

### Strengths and limitations of this study

- To our knowledge, this study will be the first to measure and quantify preferences for fertility treatment for the general population and infertile individuals in Australia.
- The study design is unique and capable of eliciting preferences from both the general population and individuals experiencing fertility treatment.
- The results will contribute to the development of an evidence-based policy framework for the provision of cost-effective and patient-centred fertility treatment in Australia.
- The SPDCE surveys will be undertaken in Australia, which could affect generalisability to other settings.

### Introduction

One in six couples suffer infertility, causing significant personal suffering to possibly more than 50 million couples worldwide<sup>1 2 3</sup>. Rates of infertility are predicted to increase with the trend to postpone childbearing, deteriorating sperm quality, and rising rates of obesity and some sexually transmitted diseases<sup>4</sup>.

Economic evaluations that consider outcomes of fertility treatment are scarce, mainly because the unique objective of fertility treatment is to create new life rather than extend or improve health-related quality of life (HRQoL), unlike other forms of medical care<sup>5</sup>. The outcomes of fertility treatment are also broader than those traditionally considered in healthcare and include substantial non-health related, such as family formation, existential meaning, and individual identity. Furthermore, process outcomes related to delivery of treatment, such as continuity of care, joint decision making, and convenience, are also important drivers of satisfaction with treatment<sup>6-11</sup>.

These multiple and varied outcomes do not usually have a market price and cannot all be captured and valued in a conventional quality-adjusted life year (QALY) framework<sup>12-17</sup>. Fertility treatment involves multiple stakeholders, including the mother, father, donor, and society, which further makes the QALY measure unsuitable<sup>12 13 18-22</sup>. Despite supportive public funding of fertility treatment in Australia through its universal health insurance scheme (Medicare), societal and individual preferences for funding fertility treatment remain largely unknown. This results in a lack of evidence about willingness to pay (WTP) for fertility treatment by either the general population (the indirect funders through tax

1  
2  
3 contribution) or infertile individuals (who directly benefit). Without estimates of the shadow  
4 price for fertility treatment, as expressed by WTP estimates, the economic value of fertility  
5 treatment and its cost-effectiveness are lacking to inform policy and resource allocation  
6 decision-making<sup>12</sup>.  
7  
8

9  
10 Using stated preference discrete choice experiment (SPDCE) has been suggested as an  
11 appropriate method for evaluating broad outcomes of fertility treatment in monetary terms<sup>13</sup>  
12<sup>16 23 24</sup>. This approach indirectly elicits willingness to pay (WTP) estimates for any treatment  
13 attributes (characteristics) without being restricted to health outcomes alone.  
14  
15

16  
17  
18 We outline a unique design of two separate but related SPDCEs to elicit treatment  
19 preferences from the general population and infertile individuals to indirectly estimate WTP  
20 values for the attributes and levels of fertility treatment. To our knowledge, this study will be  
21 the first to measure and quantify preferences for fertility treatment for both the general  
22 population and infertile individuals.  
23  
24  
25

## 26 27 **Aims**

28  
29 The specific objectives of the study are to assess WTP values for fertility treatment from the  
30 general population and infertile individuals. The study will determine whether:  
31  
32

- 33 1. The current level of Medicare expenditure for fertility treatment in Australia is in line  
34 with the general population's and individuals' WTP for the treatment;
- 35 2. The general population's WTP for fertility treatment varies by patient characteristics  
36 and family structures.
- 37 3. The general population's and patients' WTP for fertility treatment can be influenced  
38 by the attributes of treatment.  
39  
40  
41  
42  
43  
44

## 45 **Methods and analysis**

### 46 47 **Overview of SPDCE approach**

48  
49 The SPDCE approach is an attribute-based measure of value which can capture broader  
50 aspects of an intervention, including outcomes not related to health, and process outcomes  
51 related to delivery of treatment<sup>25</sup>. SPDCEs have a theoretical basis on Random Utility  
52 Theory (RUT) which assumes that individuals value an intervention based on the bundle of  
53 its attributes as a whole<sup>26</sup> and that they prefer an intervention that gives them the highest level  
54  
55  
56  
57  
58  
59  
60

1  
2  
3 of satisfaction based on the individual attributes<sup>27</sup>. In a SPDCE, respondents are presented  
4 with specially designed hypothetical scenarios of treatment programs where at least one  
5 attribute of the treatment is varied systematically in terms of its levels. Individuals are asked  
6 to choose an option they prefer, including an 'opt-out'. The extent to which respondents  
7 'trade-off' one set of attributes against one another is assessed through logistic regression  
8 models<sup>28 29</sup>. The dependent variable in the model represents the likelihood of choosing one  
9 alternative with specific attributes and levels over another. The independent variables are the  
10 attributes and levels of treatment. Heterogeneity can be accounted for using covariates or  
11 their specification in a mixed logit (MXL) or latent class (LC) models<sup>30 31 32</sup>. When a cost  
12 attribute is included, it is possible to indirectly estimate WTP values for particular attributes  
13 of treatment<sup>23 25 33 34</sup>.

14  
15  
16  
17  
18  
19  
20  
21 Crucial to the SPDCE process is the conduct of the following five stages: 1) identification of  
22 attributes for fertility treatment; 2) assignment of levels to these attributes; 3) development of  
23 an experimental design to define the choice alternatives to be presented to respondents; 4)  
24 development and administration of questionnaires to collect data; and 5) data input and  
25 analysis of responses from the surveys<sup>32 35-37</sup>. In the following section, we summarise the  
26 steps involved in our planned SPDCE.  
27  
28  
29  
30  
31  
32

### 33 **Qualitative component to inform the development of attributes and levels**

34  
35 The attributes and levels of the SPDCEs will be developed based on a qualitative component  
36 of the study, which includes a literature review and focus group discussions (FGDs)<sup>36 38-43</sup>.  
37 The latter will involve two distinct sample groups: general population and infertile  
38 individuals (n=8-16), respectively. The general population will be recruited using a poster  
39 advertisement placed on notice-boards in public places such as shopping centres and libraries,  
40 and an online classified advertisement placed on social media and advertising websites such  
41 as 'Gumtree'. Infertile individuals will be recruited from a fertility clinic in Sydney through a  
42 poster advertisement which will be placed in the clinic. These participants will be a mix of  
43 those who are considering, currently using, or have previously used fertility treatment.  
44  
45  
46  
47  
48  
49

50  
51 For both population groups, individuals who are interested in participating in the FGD are  
52 asked to respond to the study advertisements by contacting the research team through email  
53 or telephone for more information. Following contact, a member of the research team will  
54 provide additional information on the purpose of the FGDs to ensure participants have  
55  
56  
57  
58  
59  
60

adequate knowledge and understand what their participation would involve. At the same time, potential participants will be screened for eligibility. All participants must be aged 18 years or older, able to speak English, Australian citizens or residents, and with the ability to provide consent. There are no eligibility criteria related to gender or marital status. If they meet the set inclusion criteria, prospective participants will be asked to provide an email address for the researchers to send them an invitation with the details of the FGD and the Participant Information Sheet and Consent Form (PISCF). Both FGDs will be facilitated by two researchers and will last approximately 1-1.5 hours. The discussions will be audio recorded and later transcribed without any identifying information.

The FGDs will use a Nominal Group Technique (NGT)<sup>42 44-46</sup> where a facilitator will ask participants to think about the important features of fertility treatment and whether the way it is provided might matter to them or other individuals when choosing one fertility treatment over another. Participants will be asked to silently generate a list of the attributes of fertility treatment. One participant at a time will be asked to state a single attribute to the group which will be recorded verbatim on a whiteboard. This process will continue until saturation after which attributes will be clarified and similar attributes grouped together by FGD participants. Following this, participants will be asked to rank order the identified attributes privately based on personal preferences for the attributes. In case the cost attribute is not identified during the FGDs, it will, nevertheless, be included to allow the indirect estimation of willingness to pay (WTP) through marginal rate of substitution (MRS)<sup>33 47-50</sup>.

### **Selection of attributes and levels for the SPDCE**

A comprehensive list of potential attributes and levels from this qualitative work will be broadly categorised into two groups: attributes related to the outcomes of treatment; and attributes related to the process, delivery or provision of treatment<sup>6 7 11 51-55</sup>. A consensus group of experts in fertility treatment will help synthesise the attributes, assign levels to the attributes (where they were not identified by the FGDs) and refine the wording for clarity. The number of attributes to include in the SPDCE model will be limited to eight each with two to four levels based on the rules-of-thumb used in many studies<sup>35 41 56-58</sup>. Using too many attributes and levels increases the complexity of the choice tasks for respondents which may result in individuals not trading-off the attributes or in respondent fatigue<sup>59 60</sup>.



### SPDCE design

The consolidated attributes and levels of fertility treatment will be used in the initial orthogonal fractional experimental design. This will define the choice alternatives for a pilot survey of both the general population and infertile individuals<sup>50</sup>. This design will have no prior information about preferences for fertility treatment.<sup>50</sup> Subsequently, the coefficients from the pilot surveys will be used as prior information to inform the construction of optimal or efficient fractional experimental designs for the final surveys of the two sample groups<sup>58 61 62</sup>. The SPDCE designs will be unlabelled<sup>35 63 64</sup> and will follow design principles stipulated by Huber and Zwerina<sup>65</sup>. Ngene software will be used for constructing experimental designs<sup>66</sup>.

### Questionnaire development and administration

The choice tasks in the SPDCE questionnaire for the pilot surveys will be similar for the two sample groups, developed using the output of the fractional experimental designs without prior information on preferences. These choice tasks will differ in the final surveys as they will be built using the coefficients obtained from the results of the pilot surveys, which will differ between the two groups. The format of the questionnaire will follow guidelines which suggest the provision of an introduction; an explanation of the context of the survey, the attributes and their levels; an example of the choice task; an emphasis on respondents' time commitment and the importance of their participation and confidentiality<sup>50</sup>. Respondents will be guided on where to direct any queries on the survey and how to proceed answering the choices questions. The questionnaire will also include additional follow-up questions which will include an evaluation of the level of difficulty of the choice tasks on a five-point scale of very easy, easy, ok, difficult and very difficult; and respondents' socio-demographic characteristics.

The SPDCE questionnaire will be tested for face and theoretical validity. Face validity will be done with a small group of individuals to refine the phrasing and comprehension, while theoretical validity will be explored in the pilot surveys through sign and significance of the parameter estimates to ensure that they conform to a priori expectations, especially for the time or cost attribute which would normally show a monotonic relationship<sup>67</sup>. Two additional choice sets will also be included to act as consistency and reliability checks<sup>57 67 68</sup>. A consistency check is a theoretically dominant choice set on attribute-levels which is used to

1  
2  
3 test the rationality of the respondents, while a reliability check is simply a re-insertion of a  
4 choice set from the experimental design to somewhere later in the design.  
5

### 6 **Sampling and recruitment**

7  
8  
9 Sample size calculation in SPDCE studies has not been fully developed, with most studies  
10 still using the 'rules-of-thumb' or relying on the use of efficient experimental designs. This  
11 has the potential benefit of reducing confidence intervals of parameter estimates in a SPDCE  
12 model, hence permitting the use of reduced sample sizes<sup>58 69-71</sup>.  
13  
14

15  
16 A sample size of 20 respondents has been suggested as adequate to be able to estimate a  
17 SPDCE model<sup>35</sup>. Previous studies have generally shown that sample sizes of 40-100  
18 respondents may be sufficient for reliable statistical analysis<sup>72</sup>. Orme<sup>70</sup> proposes a total of  
19 300 respondents for robust quantitative research and a minimum of 200 per group for  
20 subgroup analysis. This study will benefit both from using sample sizes well above the rules-  
21 of-thumb and efficient experimental designs for the final surveys, in order to have robust  
22 results.  
23  
24  
25  
26

27  
28 All surveys will be administered online with a sample size of 30 participants for pilot surveys  
29 of the general population and infertile individuals, respectively. Participants for both pilot  
30 surveys will be recruited using the same methods as used for the FDGs. For the two samples,  
31 interested participants will respond to the study advertisements by contacting researchers  
32 either by email or phone. Following screening for eligibility, potential participants will be  
33 emailed a survey invitation and Participant Information Sheet and Consent Form (PISCF)  
34 with a link to the online pilot survey. By completing and submitting the survey, participants  
35 will be providing their consent.  
36  
37  
38  
39  
40

41  
42 The final survey for the general population will be administered by a commercial survey  
43 company, recruiting 3000 participants from a panel of the Australian population. Recruitment  
44 of infertile individuals will be through a fertility organisation's clinics and a national  
45 infertility consumer organisation (n=250-300). Interested individuals will respond to the  
46 study advertisements by email or telephone and will be emailed the invitation and PISCF  
47 with a link to an online survey. Clicking on a link within the consent form will imply consent  
48 to start the survey and they can withdraw at any time. Full consent will be deemed after they  
49 complete and submit the entire survey.  
50  
51  
52  
53  
54  
55  
56  
57  
58  
59  
60

### **Data analysis plan**

The responses from the SPDCE surveys will initially be analysed using logistic regression with a multinomial logit (MNL) model in Stata or Nlogit software. To estimate WTP, the results of a mixed logit (MXL) or latent class (LC) models which account for preference heterogeneity will be used. The success rate, time and cost attributes of fertility treatment will be modelled as continuous variables in order to apply the MRS. Differences in preferences between individual groups will be explored through the interaction between the attributes or levels and the socio-demographic characteristics. Figure 1 presents a flowchart of activities for our study:

(Figure 1)

### **Ethics and dissemination**

The ethics approval was obtained from the University of New South Wales Human Research Ethics Committee (HEC 17255) and a fertility clinic's Ethics Committee. All participants will be provided with a Participant Information Sheet and Consent Form (PISCF) before undertaking any study activity. There will be no incentive payment of any form to participants. Findings of the study will be disseminated in peer-reviewed journals and presented at various conferences. A lay summary of the results will be made available publicly on the UNSW National Perinatal Epidemiology and Statistics Unit (NPESU) website. The results will be used to contribute to the development of an evidence-based policy framework for the provision of cost-effective and patient-centred fertility treatments in Australia.

### **Limitations of SPDCE approach in the context of this study**

The SPDCE approach offers great potential for informing policy and addressing resource allocation questions related to the provision of fertility treatment. However, there are a number of methodological limitations that are common to all SPDCEs. In the context of our study, the first challenge relates to selecting a limited number of attributes and levels that are both practically feasible to include in a SPDCE and define the fertility treatment. There are likely multiple attributes and levels that could influence choices of fertility treatment from the perspective of both the general population and patients. However, only up to eight each with

two to four levels are ideal<sup>35 57</sup>. Too many attributes and levels can affect the statistical quality of the SPDCE design, and result in too great a cognitive burden on respondents to answer an excessive number of choice sets<sup>56 58</sup>.

Furthermore, the SPDCE surveys will be undertaken in Australia, which could affect generalisability to other settings. Australia is a developed country with a relatively supportive funding environment for fertility treatment through the universal insurance scheme (Medicare). Finally, the choices made by the participants based on the hypothetical scenarios presented in the SPDCE may not reflect real-life choices. However, the focus group discussions, careful development of the experimental design and analyses will minimise this risk, plus the comparison of the results of the SPDCE to the revealed preferences reflected by fertility treatment utilisation rates and government rebate will provide a mechanism for validating the results.

#### **Author affiliations**

<sup>1</sup> The National Perinatal Epidemiology and Statistics Unit, Centre for Big Data Research in Health, School of Women's and Children's Health, University of New South Wales, Level 1 AGSM Building, Sydney 2052, Australia

<sup>2</sup> National Drug and Alcohol Research Centre, University of New South Wales, Sydney 2052, Australia.

**Contributors** GC and MS wrote the grant application. WB wrote the first draft of the protocol. WB, ND, MS and GC contributed to the drafting and editing of the protocol and approved the final version.

**Funding** This study is being funded by the Australian National Health and Medical Research Council (NHMRC) project grant AP1104543.

**Competing interests** None declared.

**Ethics approval** University of New South Wales Human Research Ethics Committee (HEC 17255).

**Provenance and peer review** Not commissioned; externally peer reviewed.

**Open Access** This is an Open Access article distributed in accordance with the Creative Commons Attribution Non Commercial (CC BY-NC 4.0) license, which permits others to distribute, remix, adapt, build upon this work noncommercially, and license their derivative works on different terms, provided the original work is properly cited and the use is non-commercial. See: <http://creativecommons.org/licenses/by-nc/4.0/>.

## References

1. Mascarenhas MN, Flaxman SR, Boerma T, et al. National, regional, and global trends in infertility prevalence since 1990: a systematic analysis of 277 health surveys. *PLoS medicine* 2012;9(12):e1001356.
2. Boivin J, Bunting L, Collins JA, et al. International estimates of infertility prevalence and treatment-seeking: potential need and demand for infertility medical care. *Human reproduction* 2007;22(6):1506-12.
3. Labett Research and Marketing. Fertility study: attitudes, experiences and behaviours of Australian general public. Lower Hutt, New Zealand: Fertility Society of Australia, 2006.
4. Sharma R, Biedenharn KR, Fedor JM, et al. Lifestyle factors and reproductive health: taking control of your fertility. *Reproductive Biology and Endocrinology* 2013;11(1):66.
5. Connolly MP, Hoorens S, Chambers GM. The costs and consequences of assisted reproductive technology: an economic perspective. *Human Reproduction Update* 2010;16(6):603-13.
6. Aarts JWM, Huppelschoten AG, van Empel IWH, et al. How patient-centred care relates to patients' quality of life and distress: a study in 427 women experiencing infertility. *Human Reproduction* 2012;27(2):488-95. doi: 10.1093/humrep/der386
7. van Empel IWH, Aarts JWM, Cohlen BJ, et al. Measuring patient-centredness, the neglected outcome in fertility care: a random multicentre validation study. *Human Reproduction* 2010;25(10):2516-26. doi: 10.1093/humrep/deq219
8. Cousineau TM, Green TC, Corsini E, et al. Online psychoeducational support for infertile women: a randomized controlled trial. *Human Reproduction* 2008;23(3):554-66.
9. van Empel IWH, Nelen WLDM, Tepe ET, et al. Weaknesses, strengths and needs in fertility care according to patients. *Human Reproduction* 2010;25(1):142-49. doi: 10.1093/humrep/dep362
10. Dancet EAF, D'Hooghe TM, Sermeus W, et al. Patients from across Europe have similar views on patient-centred care: an international multilingual qualitative study in infertility care. *Human Reproduction* 2012;27(6):1702-11. doi: 10.1093/humrep/des061
11. Mourad SM, Nelen WLDM, Akkermans RP, et al. Determinants of patients' experiences and satisfaction with fertility care. *Fertility and Sterility* 2010;94(4):1254-60. doi: <http://dx.doi.org/10.1016/j.fertnstert.2009.07.990>
12. Baird D, Barri P, Bhattacharya S, et al. Economic aspects of infertility care: a challenge for researchers and clinicians. *Human Reproduction* 2015:dev163.
13. Devlin N, Parkin D. Funding fertility: issues in the allocation and distribution of resources to assisted reproduction technologies. *Human Fertility* 2003;6(sup2):S2-S6.
14. Ryan M. Should government fund assisted reproductive techniques? A study using willingness to pay. *Applied Economics* 1997;29(7):841-49.
15. Connolly MP, Hoorens S, Chambers GM. The costs and consequences of assisted reproductive technology: an economic perspective. *Human reproduction update* 2010:dmq013.
16. van den Wijngaard L, Rodijk I, van der Veen F, et al. Patient preference for a long-acting recombinant Fsh product in ovarian hyperstimulation in Ivf: a discrete choice experiment. *Human reproduction (oxford, England)* 2015;30(2):331-37.

17. Johnston RJ, Boyle KJ, Adamowicz W, et al. Contemporary Guidance for Stated Preference Studies. *Journal of the Association of Environmental and Resource Economists* 2017;4(2):319-405. doi: doi:10.1086/691697
18. Scotland G, McLernon D, Kurinczuk J, et al. Minimising twins in in vitro fertilisation: a modelling study assessing the costs, consequences and cost–utility of elective single versus double embryo transfer over a 20-year time horizon. *BJOG: An International Journal of Obstetrics & Gynaecology* 2011;118(9):1073-83.
19. Ratcliffe J. The economics of the IVF programme: a critical review: National Centre for Health Program Evaluation 1992.
20. Goldhaber-Fiebert JD, Brandeau ML. Evaluating cost-effectiveness of interventions that affect fertility and childbearing: how health effects are measured matters. *Medical Decision Making* 2015;35(7):818-46.
21. Versteegh M, Brouwer W. Patient and general public preferences for health states: a call to reconsider current guidelines. *Social Science & Medicine* 2016;165:66-74.
22. Dolan P, Edlin R. Is it really possible to build a bridge between cost-benefit analysis and cost-effectiveness analysis? *Journal of Health Economics* 2002;21(5):827-43.
23. Ryan M. Using conjoint analysis to take account of patient preferences and go beyond health outcomes: an application to in vitro fertilisation. *Social Science & Medicine* 1999;48(4):535-46. doi: [http://dx.doi.org/10.1016/S0277-9536\(98\)00374-8](http://dx.doi.org/10.1016/S0277-9536(98)00374-8)
24. Musters AM, de Bekker-Grob EW, Mochtar MH, et al. Women's perspectives regarding subcutaneous injections, costs and live birth rates in IVF. *Human reproduction* 2011;26(9):2425-31.
25. Tockhorn-Heidenreich A, Ryan M, Hernández R. Discrete Choice Experiments. In: Facey KM, Ploug Hansen H, Single ANV, eds. *Patient Involvement in Health Technology Assessment*. Singapore: Springer Singapore 2017:121-33.
26. Lancaster KJ. A new approach to consumer theory. *The journal of political economy* 1966;74(2):132-57.
27. McFadden D. Conditional logit analysis of qualitative choice behavior. *Frontiers of econometrics* 1974(Zarembka P Edition):105-42.
28. Ryan M, Gerard K, Amaya-Amaya M. Discrete Choice Experiments in a Nutshell. In: Ryan M, Gerard K, Amaya-Amaya M, eds. *Using Discrete Choice Experiments to Value Health and Health Care*: Springer Netherlands 2008:13-46.
29. Hanley N, Wright RE, Alvarez-Farizo B. Estimating the economic value of improvements in river ecology using choice experiments: an application to the water framework directive. *Journal of Environmental Management* 2006;78(2):183-93. doi: <http://dx.doi.org/10.1016/j.jenvman.2005.05.001>
30. Spinks J, Chaboyer W, Bucknall T, et al. Patient and nurse preferences for nurse handover—using preferences to inform policy: a discrete choice experiment protocol. *BMJ open* 2015;5(11):e008941.
31. Goossens LM, Utens CM, Smeenk FW, et al. Should I stay or should I go home? A latent class analysis of a discrete choice experiment on hospital-at-home. *Value in Health* 2014;17(5):588-96.
32. Lancsar E, Fiebig DG, Hole AR. Discrete Choice Experiments: A Guide to Model Specification, Estimation and Software. *PharmacoEconomics* 2017:1-20.
33. Ryan M, Kolstad J, Rockers P, et al. How to conduct a Discrete Choice Experiment for health workforce recruitment and retention in remote and rural areas: a user guide with case studies. CapacityPlus World Bank and World Health Organization 2012.
34. McIntosh E, Clarke P, Frew E, et al. *Applied Methods of Cost-Benefit Analysis in Health Care*: Oxford University Press, 2010.

- 1
  - 2
  - 3
  - 4
  - 5
  - 6
  - 7
  - 8
  - 9
  - 10
  - 11
  - 12
  - 13
  - 14
  - 15
  - 16
  - 17
  - 18
  - 19
  - 20
  - 21
  - 22
  - 23
  - 24
  - 25
  - 26
  - 27
  - 28
  - 29
  - 30
  - 31
  - 32
  - 33
  - 34
  - 35
  - 36
  - 37
  - 38
  - 39
  - 40
  - 41
  - 42
  - 43
  - 44
  - 45
  - 46
  - 47
  - 48
  - 49
  - 50
  - 51
  - 52
  - 53
  - 54
  - 55
  - 56
  - 57
  - 58
  - 59
  - 60
35. Lancsar E, Louviere J. Conducting Discrete Choice Experiments to Inform Healthcare Decision Making. *PharmacoEconomics* 2008;26(8):661-77.
36. Kløjgaard ME, Bech M, Sjøgaard R. Designing a Stated Choice Experiment: The Value of a Qualitative Process. *Journal of Choice Modelling* 2012;5(2):1-18. doi: [http://dx.doi.org/10.1016/S1755-5345\(13\)70050-2](http://dx.doi.org/10.1016/S1755-5345(13)70050-2)
37. Louviere JJ, Hensher DA, Swait JD. Stated choice methods: analysis and applications: Cambridge University Press 2000.
38. Coast J, Al-Janabi H, Sutton EJ, et al. Using qualitative methods for attribute development for discrete choice experiments: issues and recommendations. *Health Economics* 2012;21(6):730-41. doi: 10.1002/hec.1739
39. Guttman R, Castle R, Fiebig DG. Use of discrete choice experiments in health economics: An update of the literature. CHERE WORKING PAPER 2009/2 2009.
40. Kragt ME. Evidence-based Research in Environmental Choice Experiments. Working Paper 1310. Australia: School of Agricultural and Resource Economics, University of Western Australia, 2013.
41. Bridges JFP, Hauber AB, Marshall D, et al. Conjoint Analysis Applications in Health—a Checklist: A Report of the ISPOR Good Research Practices for Conjoint Analysis Task Force. *Value in Health* 2011;14(4):403-13. doi: <http://dx.doi.org/10.1016/j.jval.2010.11.013>
42. Hilgsmann M, van Durme C, Geusens P, et al. Nominal group technique to select attributes for discrete choice experiments: an example for drug treatment choice in osteoporosis. *Patient preference and adherence* 2013;7:133.
43. Vass C, Rigby D, Payne K. The Role of Qualitative Research Methods in Discrete Choice Experiments. *Medical Decision Making* 2017;0272989X16683934. doi: 10.1177/0272989X16683934
44. Harvey N, Holmes CA. Nominal group technique: An effective method for obtaining group consensus. *International Journal of Nursing Practice* 2012;18(2):188-94. doi: 10.1111/j.1440-172X.2012.02017.x
45. Kremer IEH, Evers SMAA, Jongen PJ, et al. Identification and Prioritization of Important Attributes of Disease-Modifying Drugs in Decision Making among Patients with Multiple Sclerosis: A Nominal Group Technique and Best-Worst Scaling. *PLOS ONE* 2016;11(11):e0164862. doi: 10.1371/journal.pone.0164862
46. McMillan SS, King M, Tully MP. How to use the nominal group and Delphi techniques. *International journal of clinical pharmacy* 2016;38(3):655-62.
47. Carlsson F. Non-Market Valuation: Stated Preference Methods: Oxford University Press' 2011.
48. Greiner R, Bliemer M, Ballweg J. Design considerations of a choice experiment to estimate likely participation by north Australian pastoralists in contractual biodiversity conservation. *Journal of Choice Modelling* 2014;10:34-45.
49. Ryan M, Gerard K, Watson V, et al. Practical Issues in Conducting a Discrete Choice Experiment. In: Ryan M, Gerard K, Amaya-Amaya M, eds. Using Discrete Choice Experiments to Value Health and Health Care: Springer Netherlands 2008:73-97.
50. Hensher DA, Rose JM, Greene WH. Applied Choice Analysis. Second ed. United Kingdom: Cambridge University Press 2015.
51. van Empel IWH, Dancet EAF, Koolman XHE, et al. Physicians underestimate the importance of patient-centredness to patients: a discrete choice experiment in fertility care. *Human Reproduction* 2011;26(3):584-93. doi: 10.1093/humrep/deq389
52. Dancet EAF, Nelen WLD, Sermeus W, et al. The patients' perspective on fertility care: a systematic review. *Human Reproduction Update* 2010;16(5):467-87. doi: 10.1093/humupd/dmq004

- 1  
2  
3 53. Palumbo A, De La Fuente P, Rodríguez M, et al. Willingness to pay and conjoint analysis  
4 to determine women's preferences for ovarian stimulating hormones in the treatment  
5 of infertility in Spain. *Human reproduction* 2011:der139.
- 6 54. Porter R, Kissel C, Saunders H, et al. Patient and nurse evaluation of recombinant human  
7 follicle-stimulating hormone administration methods: comparison of two follitropin  
8 injection pens. *Current Medical Research and Opinion* 2008;24(3):727-35. doi:  
9 10.1185/030079908X273291
- 10 55. Dancet EAF, D'Hooghe TM, Spiessens C, et al. Quality indicators for all dimensions of  
11 infertility care quality: consensus between professionals and patients. *Human*  
12 *Reproduction* 2013;28(6):1584-97. doi: 10.1093/humrep/det056
- 13 56. Pfarr C, Schmid A, Schneider U. Using Discrete Choice Experiments to Understand  
14 Preferences in Health Care. *Health Care Provision and Patient Mobility: Health*  
15 *Integration in the European Union* 2014:27-48.
- 16 57. Kjær T. A review of the discrete choice experiment-with emphasis on its application in  
17 health care: Syddansk Universitet Denmark 2005.
- 18 58. Rose JM, Bliemer MC. Constructing efficient stated choice experimental designs.  
19 *Transport Reviews* 2009;29(5):587-617.
- 20 59. Lloyd AJ. Threats to the estimation of benefit: are preference elicitation methods  
21 accurate? *Health economics* 2003;12(5):393-402.
- 22 60. de Bekker-Grob EW, Ryan M, Gerard K. Discrete choice experiments in health  
23 economics: a review of the literature. *Health Economics* 2012;21(2):145-72. doi:  
24 10.1002/hec.1697
- 25 61. Domínguez-Torreiro M. Alternative experimental design paradigms in choice  
26 experiments and their effects on consumer demand estimates for beef from  
27 endangered local cattle breeds: An empirical test. *Food Quality and Preference*  
28 2014;35:15-23.
- 29 62. Hauber AB, González JM, Groothuis-Oudshoorn CG, et al. Statistical Methods for the  
30 Analysis of Discrete Choice Experiments: A Report of the ISPOR Conjoint Analysis  
31 Good Research Practices Task Force. *Value in Health* 2016
- 32 63. Doherty E, Campbell D, Hynes S, et al. Examining labelling effects within discrete  
33 choice experiments: An application to recreational site choice. *Journal of*  
34 *Environmental Management* 2013;125(0):94-104. doi:  
35 <http://dx.doi.org/10.1016/j.jenvman.2013.03.056>
- 36 64. Hoyos D. The state of the art of environmental valuation with discrete choice  
37 experiments. *Ecological Economics* 2010;69(8):1595-603. doi:  
38 10.1016/j.ecolecon.2010.04.011
- 39 65. Huber J, Zwerina K. The importance of utility balance in efficient choice designs. *Journal*  
40 *of Marketing research* 1996:307-17.
- 41 66. Choicemetrics. Ngene 1.1.2: User manual and reference guide: Choice Metrics Pty Ltd,  
42 2014.
- 43 67. Ryan M, Major K, Skåtun D. Using discrete choice experiments to go beyond clinical  
44 outcomes when evaluating clinical practice. *Journal of evaluation in clinical practice*  
45 2005;11(4):328-38.
- 46 68. Carlsson F, Mørkbak MR, Olsen SB. The first time is the hardest: A test of ordering  
47 effects in choice experiments. *Journal of Choice Modelling* 2012;5(2):19-37. doi:  
48 [http://dx.doi.org/10.1016/S1755-5345\(13\)70051-4](http://dx.doi.org/10.1016/S1755-5345(13)70051-4)
- 49 69. Efficiency benefits of choice model experimental design updating: a case study. 2009  
50 Conference (53rd), February 11-13, 2009, Cairns, Australia; 2009. Australian  
51 Agricultural and Resource Economics Society.
- 52  
53  
54  
55  
56  
57  
58  
59  
60



- 1  
2  
3 70. Orme B. Getting Started with Conjoint Analysis: Strategies for Product Design and  
4 Pricing Research Madison. *Wisconsin: Research Publishers* 2006  
5 71. de Bekker-Grob E, Donkers B, Jonker M, et al. Sample Size Requirements for Discrete-  
6 Choice Experiments in Healthcare: a Practical Guide. *The Patient - Patient-Centered*  
7 *Outcomes Research* 2015;1-12. doi: 10.1007/s40271-015-0118-z  
8 72. de Bekker-Grob E, Bliemer M, Donkers B, et al. Patients' and urologists' preferences for  
9 prostate cancer treatment: a discrete choice experiment. *British journal of cancer*  
10 2013;109(3):633-40.  
11  
12  
13  
14  
15  
16  
17  
18

19 **Figure 1: A flowchart of activities**  
20  
21  
22  
23  
24  
25  
26  
27  
28  
29  
30  
31  
32  
33  
34  
35  
36  
37  
38  
39  
40  
41  
42  
43  
44  
45  
46  
47  
48  
49  
50  
51  
52  
53  
54  
55  
56  
57  
58  
59  
60

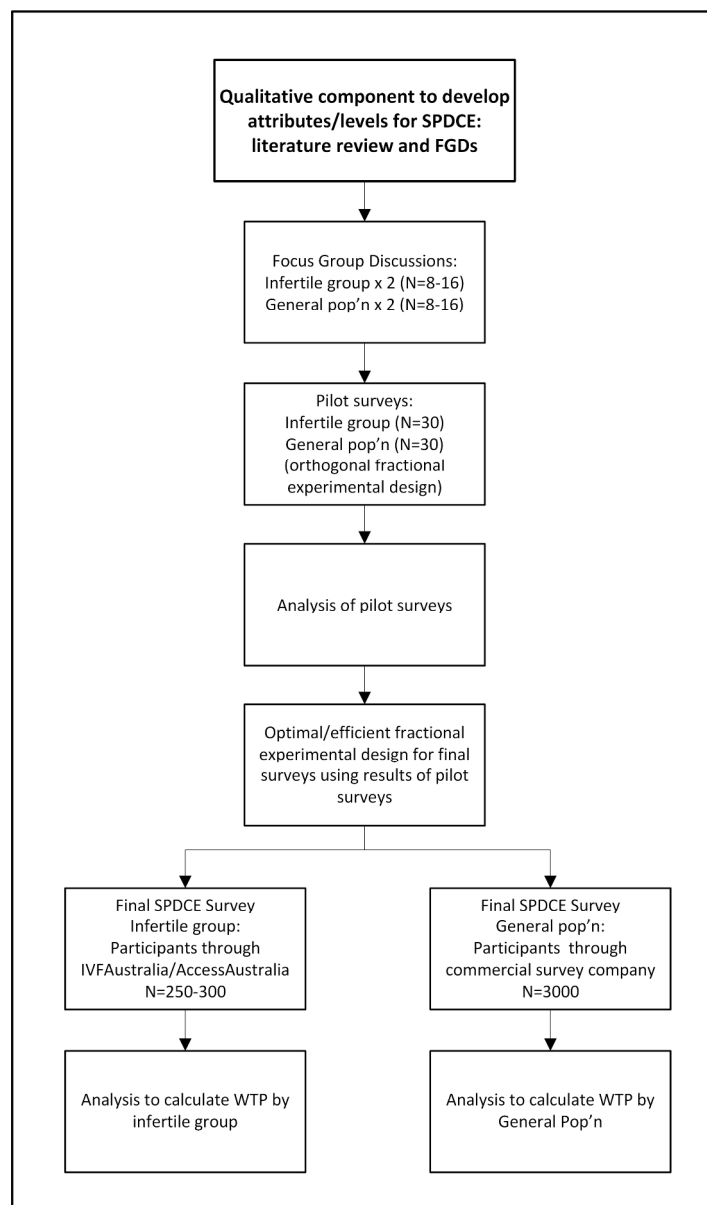

Figure 1: A flowchart of activities

187x318mm (300 x 300 DPI)

# BMJ Open

## An assessment of the societal and individual preferences for fertility treatment in Australia: study protocol for stated preference discrete choice experiments

|                                 |                                                                                                                                                                                                                                                                                                                                                                                                                                                                                                                                                                                                       |
|---------------------------------|-------------------------------------------------------------------------------------------------------------------------------------------------------------------------------------------------------------------------------------------------------------------------------------------------------------------------------------------------------------------------------------------------------------------------------------------------------------------------------------------------------------------------------------------------------------------------------------------------------|
| Journal:                        | <i>BMJ Open</i>                                                                                                                                                                                                                                                                                                                                                                                                                                                                                                                                                                                       |
| Manuscript ID                   | bmjopen-2017-020509.R2                                                                                                                                                                                                                                                                                                                                                                                                                                                                                                                                                                                |
| Article Type:                   | Protocol                                                                                                                                                                                                                                                                                                                                                                                                                                                                                                                                                                                              |
| Date Submitted by the Author:   | 17-Jan-2018                                                                                                                                                                                                                                                                                                                                                                                                                                                                                                                                                                                           |
| Complete List of Authors:       | Botha, Willings; University of New South Wales - Randwick Campus, Centre for Big Data Research in Health and School of Women's and Children's Health<br>Donnolley, Natasha; University of New South Wales - Randwick Campus, Centre for Big Data Research in Health and School of Women's and Children's Health<br>Shanahan , Marian Shanahan ; University of New South Wales - Randwick Campus, National Drug and Alcohol Research Centre<br>Chambers, Georgina; University of New South Wales - Randwick Campus, Centre for Big Data Research in Health and School of Women's and Children's Health |
| <b>Primary Subject Heading</b>: | Health economics                                                                                                                                                                                                                                                                                                                                                                                                                                                                                                                                                                                      |
| Secondary Subject Heading:      | Reproductive medicine                                                                                                                                                                                                                                                                                                                                                                                                                                                                                                                                                                                 |
| Keywords:                       | REPRODUCTIVE MEDICINE, infertility, Stated preference discrete choice experiment, willingness to pay                                                                                                                                                                                                                                                                                                                                                                                                                                                                                                  |
|                                 |                                                                                                                                                                                                                                                                                                                                                                                                                                                                                                                                                                                                       |

SCHOLARONE™  
Manuscripts

# **An assessment of the societal and individual preferences for fertility treatment in Australia: study protocol for stated preference discrete choice experiments**

*Willings Botha<sup>1</sup>, Natasha Donnelly<sup>1</sup>, Marian Shanahan<sup>2</sup>, Georgina M. Chambers<sup>1</sup>*

<sup>1</sup>The National Perinatal Epidemiology and Statistics Unit, Centre for Big Data Research in Health, School of Women's and Children's Health, University of New South Wales, Level 1 AGSM Building, Sydney 2052, Australia

<sup>2</sup>National Drug and Alcohol Research Centre, University of New South Wales, Sydney 2052, Australia.

**Correspondence to: Dr Willings Botha; [w.botha@unsw.edu.au](mailto:w.botha@unsw.edu.au)**

## **Abstract**

### **Introduction**

In Australia, societal and individual preferences for funding fertility treatment remain largely unknown. This has resulted in a lack of evidence about willingness to pay (WTP) for fertility treatment by either the general population (the funders) or infertile individuals (who directly benefit). Using a stated preference discrete choice experiment (SPDCE) approach has been suggested as a more appropriate method to inform economic evaluations of fertility treatment.

We outline the protocol for an ongoing study which aims to assess fertility treatment preferences of both the general population and infertile individuals and indirectly estimate their WTP for fertility treatment.

### **Methods and analysis**

Two separate but related SPDCEs will be conducted for two population samples — the general population and infertile individuals — to elicit preferences for fertility treatment to indirectly estimate willingness to pay. We describe the qualitative work to be undertaken to design the SPDCEs. We will use D-efficient fractional experimental designs informed by prior coefficients from the pilot surveys. The mode of administration for the SPDCE is also discussed. The final results will be analysed using mixed logit (MXL) or latent class (LC) models.

### **Ethics and dissemination**

This study is being funded by the Australian National Health and Medical Research Council (NHMRC) project grant AP1104543 and has been approved by the University of New South

1  
2  
3 Wales Human Research Ethics Committee (HEC 17255) and a fertility clinic's Ethics  
4 Committee. Findings of the study will be disseminated in peer-reviewed journals and  
5 presented at various conferences. A lay summary of the results will be made publicly  
6 available on the UNSW National Perinatal Epidemiology and Statistics Unit (NPESU)  
7 website. Our results will contribute to the development of an evidence-based policy  
8 framework for the provision of cost-effective and patient-centred fertility treatment in  
9 Australia.  
10  
11  
12  
13  
14  
15  
16  
17  
18  
19  
20  
21  
22  
23  
24  
25  
26  
27  
28  
29  
30  
31  
32  
33  
34  
35  
36  
37  
38  
39  
40  
41  
42  
43  
44  
45  
46  
47  
48  
49  
50  
51  
52  
53  
54  
55  
56  
57  
58  
59  
60

For peer review only

### Strengths and limitations of this study

- To our knowledge, this study will be the first to measure and quantify preferences for fertility treatment for the general population and infertile individuals in Australia.
- The study design is unique and capable of eliciting preferences from both the general population and individuals experiencing fertility treatment.
- The results will contribute to the development of an evidence-based policy framework for the provision of cost-effective and patient-centred fertility treatment in Australia.
- The SPDCE surveys will be undertaken in Australia, which could affect generalisability to other settings.

### Introduction

One in six couples suffer infertility, causing significant personal suffering to possibly more than 50 million couples worldwide<sup>1 2 3</sup>. Rates of infertility are predicted to increase with the trend to postpone childbearing, deteriorating sperm quality, and rising rates of obesity and some sexually transmitted diseases<sup>4</sup>.

Economic evaluations that consider outcomes of fertility treatment are scarce, mainly because the unique objective of fertility treatment is to create new life rather than extend or improve health-related quality of life (HRQoL), unlike other forms of medical care<sup>5</sup>. The outcomes of fertility treatment are also broader than those traditionally considered in healthcare and include substantial non-health related, such as family formation, existential meaning, and individual identity. Furthermore, process outcomes related to delivery of treatment, such as continuity of care, joint decision making, and convenience, are also important drivers of satisfaction with treatment<sup>6-11</sup>.

These multiple and varied outcomes do not usually have a market price and cannot all be captured and valued in a conventional quality-adjusted life year (QALY) framework<sup>12-17</sup>. Fertility treatment involves multiple stakeholders, including the mother, father, donor, and society, which further makes the QALY measure unsuitable<sup>12 13 18-22</sup>. Despite supportive public funding of fertility treatment in Australia through its universal health insurance scheme (Medicare), societal and individual preferences for funding fertility treatment remain largely unknown. This results in a lack of evidence about willingness to pay (WTP) for fertility treatment by either the general population (the indirect funders through tax contribution) or infertile individuals (who directly benefit). Without estimates of the shadow

price for fertility treatment, as expressed by WTP estimates, the economic value of fertility treatment and its cost-effectiveness are lacking to inform policy and resource allocation decision-making<sup>12</sup>.

Using stated preference discrete choice experiment (SPDCE) has been suggested as an appropriate method for evaluating broad outcomes of fertility treatment in monetary terms<sup>13</sup><sup>16</sup><sup>23</sup><sup>24</sup>. This approach indirectly elicits willingness to pay (WTP) estimates for any treatment attributes (characteristics) without being restricted to health outcomes alone.

We outline a unique design of two separate but related SPDCEs to elicit treatment preferences from the general population and infertile individuals to indirectly estimate WTP values for the attributes and levels of fertility treatment. The general population sample will be representative of the Australian population which includes members of the lesbian, gay, bisexual, transgender, intersex and queer (LGBTIQ) community. Infertile individuals will be patients recruited from fertility clinics who may also include members of the LGBTIQ community who have access to a variety of treatment options such as donor and egg sharing programs. To our knowledge, this study will be the first to measure and quantify preferences for fertility treatment for both the general population and infertile individuals.

### **Aims**

The specific objectives of the study are to assess WTP values for fertility treatment from the general population and infertile individuals. The study will determine whether:

1. The current level of Medicare expenditure for fertility treatment in Australia is in line with the general population's and individuals' WTP for the treatment;
2. The general population's WTP for fertility treatment varies by patient characteristics and family structures.
3. The general population's and patients' WTP for fertility treatment can be influenced by the attributes of treatment.

### **Methods and analysis**

#### **Overview of SPDCE approach**

The SPDCE approach is an attribute-based measure of value which can capture broader aspects of an intervention, including outcomes not related to health, and process outcomes related to delivery of treatment<sup>25</sup>. SPDCEs have a theoretical basis on Random Utility

1  
2  
3 Theory (RUT) which assumes that individuals value an intervention based on the bundle of  
4 its attributes as a whole<sup>26</sup> and that they prefer an intervention that gives them the highest level  
5 of satisfaction based on the individual attributes<sup>27</sup>. In a SPDCE, respondents are presented  
6 with specially designed hypothetical scenarios of treatment programs where at least one  
7 attribute of the treatment is varied systematically in terms of its levels. Individuals are asked  
8 to choose an option they prefer, including an 'opt-out'. The extent to which respondents  
9 'trade-off' one set of attributes against one another is assessed through logistic regression  
10 models<sup>28 29</sup>. The dependent variable in the model represents the likelihood of choosing one  
11 alternative with specific attributes and levels over another. The independent variables are the  
12 attributes and levels of treatment. Heterogeneity can be accounted for using covariates or  
13 their specification in a mixed logit (MXL) or latent class (LC) models<sup>30 31 32</sup>. When a cost  
14 attribute is included, it is possible to indirectly estimate WTP values for particular attributes  
15 of treatment<sup>23 25 33 34</sup>.

16  
17  
18  
19  
20  
21  
22  
23  
24 Crucial to the SPDCE process is the conduct of the following five stages: 1) identification of  
25 attributes for fertility treatment; 2) assignment of levels to these attributes; 3) development of  
26 an experimental design to define the choice alternatives to be presented to respondents; 4)  
27 development and administration of questionnaires to collect data; and 5) data input and  
28 analysis of responses from the surveys<sup>32 35-37</sup>. We are currently in the first stage of  
29 identifying attributes of fertility treatment. The whole study is estimated to take 18 months  
30 from June 2017 when ethical approval was obtained. In the following section, we summarise  
31 the steps involved in our planned SPDCE.  
32  
33  
34  
35  
36  
37  
38  
39

### 40 **Qualitative component to inform the development of attributes and levels**

41  
42 The attributes and levels of the SPDCEs will be developed based on a qualitative component  
43 of the study, which includes a literature review and focus group discussions (FGDs)<sup>36 38-43</sup>.  
44 The latter will involve two distinct sample groups: general population and infertile  
45 individuals (n=8-16), respectively. The general population will be recruited using a poster  
46 advertisement placed on notice-boards in public places such as shopping centres and libraries,  
47 and an online classified advertisement placed on social media and advertising websites such  
48 as 'Gumtree'. Infertile individuals will be recruited from a fertility clinic in Sydney through a  
49 poster advertisement which will be placed in the clinic. These participants will be a mix of  
50 those who are considering, currently using, or have previously used fertility treatment.  
51  
52  
53  
54  
55  
56  
57  
58  
59  
60



1  
2  
3 For both population groups, individuals who are interested in participating in the FGD are  
4 asked to respond to the study advertisements by contacting the research team through email  
5 or telephone for more information. Following contact, a member of the research team will  
6 provide additional information on the purpose of the FGDs to ensure participants have  
7 adequate knowledge and understand what their participation would involve. At the same  
8 time, potential participants will be screened for eligibility. All participants must be aged 18  
9 years or older, able to speak English, Australian citizens or residents, and with the ability to  
10 provide consent. There are no eligibility criteria related to gender or marital status. If they  
11 meet the set inclusion criteria, prospective participants will be asked to provide an email  
12 address for the researchers to send them an invitation with the details of the FGD and the  
13 Participant Information Sheet and Consent Form (PISCF). Both FGDs will be facilitated by  
14 two researchers and will last approximately 1-1.5 hours. The discussions will be audio  
15 recorded and later transcribed without any identifying information.

16  
17 The FGDs will use a Nominal Group Technique (NGT)<sup>42 44-46</sup> where a facilitator will ask  
18 participants to think about the important features of fertility treatment and whether the way it  
19 is provided might matter to them or other individuals when choosing one fertility treatment  
20 over another. Participants will be asked to silently generate a list of the attributes of fertility  
21 treatment. One participant at a time will be asked to state a single attribute to the group which  
22 will be recorded verbatim on a whiteboard. This process will continue until saturation after  
23 which attributes will be clarified and similar attributes grouped together by FGD participants.  
24 Following this, participants will be asked to rank order the identified attributes privately  
25 based on personal preferences for the attributes. In case the cost attribute is not identified  
26 during the FGDs, it will, nevertheless, be included to allow the indirect estimation of  
27 willingness to pay (WTP) through marginal rate of substitution (MRS)<sup>33 47-50</sup>.

### 28 **Selection of attributes and levels for the SPDCE**

29 A comprehensive list of potential attributes and levels from this qualitative work will be  
30 broadly categorised into two groups: attributes related to the outcomes of treatment; and  
31 attributes related to the process, delivery or provision of treatment<sup>6 7 11 51-55</sup>. A consensus  
32 group of experts in fertility treatment will help synthesise the attributes, assign levels to the  
33 attributes (where they were not identified by the FGDs) and refine the wording for clarity.  
34 The number of attributes to include in the SPDCE model will be limited to eight each with  
35 two to four levels based on the rules-of-thumb used in many studies<sup>35 41 56-58</sup>. Using too many  
36  
37  
38  
39  
40  
41  
42  
43  
44  
45  
46  
47  
48  
49  
50  
51  
52  
53  
54  
55  
56  
57  
58  
59  
60

1  
2  
3 attributes and levels increases the complexity of the choice tasks for respondents which may  
4 result in individuals not trading-off the attributes or in respondent fatigue<sup>59 60</sup>.

### 6 7 **SPDCE design**

8  
9 The consolidated attributes and levels of fertility treatment will be used in the initial  
10 orthogonal fractional experimental design. This will define the choice alternatives for a pilot  
11 survey of both the general population and infertile individuals<sup>50</sup>. This design will have no  
12 prior information about preferences for fertility treatment.<sup>50</sup>. Subsequently, the coefficients  
13 from the pilot surveys will be used as prior information to inform the construction of optimal  
14 or efficient fractional experimental designs for the final surveys of the two sample groups<sup>58 61</sup>  
15  
16  
17  
18  
19  
20  
21  
22  
23  
24  
25  
26  
27  
28  
29  
30  
31  
32  
33  
34  
35  
36  
37  
38  
39  
40  
41  
42  
43  
44  
45  
46  
47  
48  
49  
50  
51  
52  
53  
54  
55  
56  
57  
58  
59  
60  
61  
62  
63  
64  
65  
66  
67  
68  
69  
70  
71  
72  
73  
74  
75  
76  
77  
78  
79  
80  
81  
82  
83  
84  
85  
86  
87  
88  
89  
90  
91  
92  
93  
94  
95  
96  
97  
98  
99  
100  
101  
102  
103  
104  
105  
106  
107  
108  
109  
110  
111  
112  
113  
114  
115  
116  
117  
118  
119  
120  
121  
122  
123  
124  
125  
126  
127  
128  
129  
130  
131  
132  
133  
134  
135  
136  
137  
138  
139  
140  
141  
142  
143  
144  
145  
146  
147  
148  
149  
150  
151  
152  
153  
154  
155  
156  
157  
158  
159  
160  
161  
162  
163  
164  
165  
166  
167  
168  
169  
170  
171  
172  
173  
174  
175  
176  
177  
178  
179  
180  
181  
182  
183  
184  
185  
186  
187  
188  
189  
190  
191  
192  
193  
194  
195  
196  
197  
198  
199  
200  
201  
202  
203  
204  
205  
206  
207  
208  
209  
210  
211  
212  
213  
214  
215  
216  
217  
218  
219  
220  
221  
222  
223  
224  
225  
226  
227  
228  
229  
230  
231  
232  
233  
234  
235  
236  
237  
238  
239  
240  
241  
242  
243  
244  
245  
246  
247  
248  
249  
250  
251  
252  
253  
254  
255  
256  
257  
258  
259  
260  
261  
262  
263  
264  
265  
266  
267  
268  
269  
270  
271  
272  
273  
274  
275  
276  
277  
278  
279  
280  
281  
282  
283  
284  
285  
286  
287  
288  
289  
290  
291  
292  
293  
294  
295  
296  
297  
298  
299  
300  
301  
302  
303  
304  
305  
306  
307  
308  
309  
310  
311  
312  
313  
314  
315  
316  
317  
318  
319  
320  
321  
322  
323  
324  
325  
326  
327  
328  
329  
330  
331  
332  
333  
334  
335  
336  
337  
338  
339  
340  
341  
342  
343  
344  
345  
346  
347  
348  
349  
350  
351  
352  
353  
354  
355  
356  
357  
358  
359  
360  
361  
362  
363  
364  
365  
366  
367  
368  
369  
370  
371  
372  
373  
374  
375  
376  
377  
378  
379  
380  
381  
382  
383  
384  
385  
386  
387  
388  
389  
390  
391  
392  
393  
394  
395  
396  
397  
398  
399  
400  
401  
402  
403  
404  
405  
406  
407  
408  
409  
410  
411  
412  
413  
414  
415  
416  
417  
418  
419  
420  
421  
422  
423  
424  
425  
426  
427  
428  
429  
430  
431  
432  
433  
434  
435  
436  
437  
438  
439  
440  
441  
442  
443  
444  
445  
446  
447  
448  
449  
450  
451  
452  
453  
454  
455  
456  
457  
458  
459  
460  
461  
462  
463  
464  
465  
466  
467  
468  
469  
470  
471  
472  
473  
474  
475  
476  
477  
478  
479  
480  
481  
482  
483  
484  
485  
486  
487  
488  
489  
490  
491  
492  
493  
494  
495  
496  
497  
498  
499  
500  
501  
502  
503  
504  
505  
506  
507  
508  
509  
510  
511  
512  
513  
514  
515  
516  
517  
518  
519  
520  
521  
522  
523  
524  
525  
526  
527  
528  
529  
530  
531  
532  
533  
534  
535  
536  
537  
538  
539  
540  
541  
542  
543  
544  
545  
546  
547  
548  
549  
550  
551  
552  
553  
554  
555  
556  
557  
558  
559  
560  
561  
562  
563  
564  
565  
566  
567  
568  
569  
570  
571  
572  
573  
574  
575  
576  
577  
578  
579  
580  
581  
582  
583  
584  
585  
586  
587  
588  
589  
590  
591  
592  
593  
594  
595  
596  
597  
598  
599  
600  
601  
602  
603  
604  
605  
606  
607  
608  
609  
610  
611  
612  
613  
614  
615  
616  
617  
618  
619  
620  
621  
622  
623  
624  
625  
626  
627  
628  
629  
630  
631  
632  
633  
634  
635  
636  
637  
638  
639  
640  
641  
642  
643  
644  
645  
646  
647  
648  
649  
650  
651  
652  
653  
654  
655  
656  
657  
658  
659  
660  
661  
662  
663  
664  
665  
666  
667  
668  
669  
670  
671  
672  
673  
674  
675  
676  
677  
678  
679  
680  
681  
682  
683  
684  
685  
686  
687  
688  
689  
690  
691  
692  
693  
694  
695  
696  
697  
698  
699  
700  
701  
702  
703  
704  
705  
706  
707  
708  
709  
710  
711  
712  
713  
714  
715  
716  
717  
718  
719  
720  
721  
722  
723  
724  
725  
726  
727  
728  
729  
730  
731  
732  
733  
734  
735  
736  
737  
738  
739  
740  
741  
742  
743  
744  
745  
746  
747  
748  
749  
750  
751  
752  
753  
754  
755  
756  
757  
758  
759  
760  
761  
762  
763  
764  
765  
766  
767  
768  
769  
770  
771  
772  
773  
774  
775  
776  
777  
778  
779  
780  
781  
782  
783  
784  
785  
786  
787  
788  
789  
790  
791  
792  
793  
794  
795  
796  
797  
798  
799  
800  
801  
802  
803  
804  
805  
806  
807  
808  
809  
810  
811  
812  
813  
814  
815  
816  
817  
818  
819  
820  
821  
822  
823  
824  
825  
826  
827  
828  
829  
830  
831  
832  
833  
834  
835  
836  
837  
838  
839  
840  
841  
842  
843  
844  
845  
846  
847  
848  
849  
850  
851  
852  
853  
854  
855  
856  
857  
858  
859  
860  
861  
862  
863  
864  
865  
866  
867  
868  
869  
870  
871  
872  
873  
874  
875  
876  
877  
878  
879  
880  
881  
882  
883  
884  
885  
886  
887  
888  
889  
890  
891  
892  
893  
894  
895  
896  
897  
898  
899  
900  
901  
902  
903  
904  
905  
906  
907  
908  
909  
910  
911  
912  
913  
914  
915  
916  
917  
918  
919  
920  
921  
922  
923  
924  
925  
926  
927  
928  
929  
930  
931  
932  
933  
934  
935  
936  
937  
938  
939  
940  
941  
942  
943  
944  
945  
946  
947  
948  
949  
950  
951  
952  
953  
954  
955  
956  
957  
958  
959  
960  
961  
962  
963  
964  
965  
966  
967  
968  
969  
970  
971  
972  
973  
974  
975  
976  
977  
978  
979  
980  
981  
982  
983  
984  
985  
986  
987  
988  
989  
990  
991  
992  
993  
994  
995  
996  
997  
998  
999  
1000

### 24 25 **Questionnaire development and administration**

26  
27 The choice tasks in the SPDCE questionnaire for the pilot surveys will be similar for the two  
28 sample groups, developed using the output of the fractional experimental designs without  
29 prior information on preferences. These choice tasks will differ in the final surveys as they  
30 will be built using the coefficients obtained from the results of the pilot surveys, which will  
31 differ between the two groups. The format of the questionnaire will follow guidelines which  
32 suggest the provision of an introduction; an explanation of the context of the survey, the  
33 attributes and their levels; an example of the choice task; an emphasis on respondents' time  
34 commitment and the importance of their participation and confidentiality<sup>50</sup>. Respondents will  
35 be guided on where to direct any queries on the survey and how to proceed answering the  
36 choices questions. The questionnaire will also include additional follow-up questions which  
37 will include an evaluation of the level of difficulty of the choice tasks on a five-point scale of  
38 very easy, easy, ok, difficult and very difficult; and respondents' socio-demographic  
39 characteristics.  
40  
41  
42  
43  
44  
45  
46  
47

48  
49 The SPDCE questionnaire will be tested for face and theoretical validity. Face validity will  
50 be done with a small group of individuals to refine the phrasing and comprehension, while  
51 theoretical validity will be explored in the pilot surveys through sign and significance of the  
52 parameter estimates to ensure that they conform to a priori expectations, especially for the  
53 time or cost attribute which would normally show a monotonic relationship<sup>67</sup>. Two  
54 additional choice sets will also be included to act as consistency and reliability checks<sup>57 67 68</sup>.

1  
2  
3 A consistency check is a theoretically dominant choice set on attribute-levels which is used to  
4 test the rationality of the respondents, while a reliability check is simply a re-insertion of a  
5 choice set from the experimental design to somewhere later in the design.  
6  
7

### 8 **Sampling and recruitment**

9

10 Sample size calculation in SPDCE studies has not been fully developed, with most studies  
11 still using the 'rules-of-thumb' or relying on the use of efficient experimental designs. This  
12 has the potential benefit of reducing confidence intervals of parameter estimates in a SPDCE  
13 model, hence permitting the use of reduced sample sizes<sup>58 69-71</sup>.  
14  
15

16  
17 A sample size of 20 respondents has been suggested as adequate to be able to estimate a  
18 SPDCE model<sup>35</sup>. Previous studies have generally shown that sample sizes of 40-100  
19 respondents may be sufficient for reliable statistical analysis<sup>72</sup>. Orme<sup>70</sup> proposes a total of  
20 300 respondents for robust quantitative research and a minimum of 200 per group for  
21 subgroup analysis. This study will benefit both from using sample sizes well above the rules-  
22 of-thumb and efficient experimental designs for the final surveys, in order to have robust  
23 results.  
24  
25

26  
27 All surveys will be administered online with a sample size of 30 participants for pilot surveys  
28 of the general population and infertile individuals, respectively. Participants for both pilot  
29 surveys will be recruited using the same methods as used for the FDGs. For the two samples,  
30 interested participants will respond to the study advertisements by contacting researchers  
31 either by email or phone. Following screening for eligibility, potential participants will be  
32 emailed a survey invitation and Participant Information Sheet and Consent Form (PISCF)  
33 with a link to the online pilot survey. By completing and submitting the survey, participants  
34 will be providing their consent.  
35  
36

37  
38 The final survey for the general population will be administered by a commercial survey  
39 company, recruiting 3000 participants from a panel of the Australian population. Recruitment  
40 of infertile individuals will be through a fertility organisation's clinics and a national  
41 infertility consumer organisation (n=250-300). Interested individuals will respond to the  
42 study advertisements by email or telephone and will be emailed the invitation and PISCF  
43 with a link to an online survey. Clicking on a link within the consent form will imply consent  
44 to start the survey and they can withdraw at any time. Full consent will be deemed after they  
45 complete and submit the entire survey.  
46  
47  
48  
49  
50  
51  
52  
53  
54  
55  
56  
57  
58  
59  
60

### **Data analysis plan**

The responses from the SPDCE surveys will initially be analysed using logistic regression with a multinomial logit (MNL) model in Stata or Nlogit software. To estimate WTP, the results of a mixed logit (MXL) or latent class (LC) models which account for preference heterogeneity will be used. The success rate, time and cost attributes of fertility treatment will be modelled as continuous variables in order to apply the MRS. Differences in preferences between individual groups will be explored through the interaction between the attributes or levels and the socio-demographic characteristics. Figure 1 presents a flowchart of activities for our study:

(Figure 1)

### **Ethics and dissemination**

The ethics approval was obtained from the University of New South Wales Human Research Ethics Committee (HEC 17255) and a fertility clinic's Ethics Committee. All participants will be provided with a Participant Information Sheet and Consent Form (PISCF) before undertaking any study activity. There will be no incentive payment of any form to participants. Findings of the study will be disseminated in peer-reviewed journals and presented at various conferences. A lay summary of the results will be made available publicly on the UNSW National Perinatal Epidemiology and Statistics Unit (NPESU) website. The results will be used to contribute to the development of an evidence-based policy framework for the provision of cost-effective and patient-centred fertility treatments in Australia.

### **Limitations of SPDCE approach in the context of this study**

The SPDCE approach offers great potential for informing policy and addressing resource allocation questions related to the provision of fertility treatment. However, there are a number of methodological limitations that are common to all SPDCEs. In the context of our study, the first challenge relates to selecting a limited number of attributes and levels that are both practically feasible to include in a SPDCE and define the fertility treatment. There are likely multiple attributes and levels that could influence choices of fertility treatment from the perspective of both the general population and patients. However, only up to eight each with

two to four levels are ideal<sup>35 57</sup>. Too many attributes and levels can affect the statistical quality of the SPDCE design, and result in too great a cognitive burden on respondents to answer an excessive number of choice sets<sup>56 58</sup>.

Furthermore, the SPDCE surveys will be undertaken in Australia, which could affect generalisability to other settings. Australia is a developed country with a relatively supportive funding environment for fertility treatment through the universal insurance scheme (Medicare). Finally, the choices made by the participants based on the hypothetical scenarios presented in the SPDCE may not reflect real-life choices. However, the focus group discussions, careful development of the experimental design and analyses will minimise this risk, plus the comparison of the results of the SPDCE to the revealed preferences reflected by fertility treatment utilisation rates and government rebate will provide a mechanism for validating the results.

#### **Author affiliations**

<sup>1</sup> The National Perinatal Epidemiology and Statistics Unit, Centre for Big Data Research in Health, School of Women's and Children's Health, University of New South Wales, Level 1 AGSM Building, Sydney 2052, Australia

<sup>2</sup> National Drug and Alcohol Research Centre, University of New South Wales, Sydney 2052, Australia.

**Contributors** GC and MS wrote the grant application. WB wrote the first draft of the protocol. WB, ND, MS and GC contributed to the drafting and editing of the protocol and approved the final version.

**Funding** This study is being funded by the Australian National Health and Medical Research Council (NHMRC) project grant AP1104543.

**Competing interests** None declared.

**Ethics approval** University of New South Wales Human Research Ethics Committee (HEC 17255).

**Provenance and peer review** Not commissioned; externally peer reviewed.

**Open Access** This is an Open Access article distributed in accordance with the Creative Commons Attribution Non Commercial (CC BY-NC 4.0) license, which permits others to distribute, remix, adapt, build upon this work noncommercially, and license their derivative works on different terms, provided the original work is properly cited and the use is non-commercial. See: <http://creativecommons.org/licenses/by-nc/4.0/>.

## References

1. Mascarenhas MN, Flaxman SR, Boerma T, et al. National, regional, and global trends in infertility prevalence since 1990: a systematic analysis of 277 health surveys. *PLoS medicine* 2012;9(12):e1001356.
2. Boivin J, Bunting L, Collins JA, et al. International estimates of infertility prevalence and treatment-seeking: potential need and demand for infertility medical care. *Human reproduction* 2007;22(6):1506-12.
3. Labett Research and Marketing. Fertility study: attitudes, experiences and behaviours of Australian general public. Lower Hutt, New Zealand: Fertility Society of Australia, 2006.
4. Sharma R, Biedenharn KR, Fedor JM, et al. Lifestyle factors and reproductive health: taking control of your fertility. *Reproductive Biology and Endocrinology* 2013;11(1):66.
5. Connolly MP, Hoorens S, Chambers GM. The costs and consequences of assisted reproductive technology: an economic perspective. *Human Reproduction Update* 2010;16(6):603-13.
6. Aarts JWM, Huppelschoten AG, van Empel IWH, et al. How patient-centred care relates to patients' quality of life and distress: a study in 427 women experiencing infertility. *Human Reproduction* 2012;27(2):488-95. doi: 10.1093/humrep/der386
7. van Empel IWH, Aarts JWM, Cohlen BJ, et al. Measuring patient-centredness, the neglected outcome in fertility care: a random multicentre validation study. *Human Reproduction* 2010;25(10):2516-26. doi: 10.1093/humrep/deq219
8. Cousineau TM, Green TC, Corsini E, et al. Online psychoeducational support for infertile women: a randomized controlled trial. *Human Reproduction* 2008;23(3):554-66.
9. van Empel IWH, Nelen WLDM, Tepe ET, et al. Weaknesses, strengths and needs in fertility care according to patients. *Human Reproduction* 2010;25(1):142-49. doi: 10.1093/humrep/dep362
10. Dancet EAF, D'Hooghe TM, Sermeus W, et al. Patients from across Europe have similar views on patient-centred care: an international multilingual qualitative study in infertility care. *Human Reproduction* 2012;27(6):1702-11. doi: 10.1093/humrep/des061
11. Mourad SM, Nelen WLDM, Akkermans RP, et al. Determinants of patients' experiences and satisfaction with fertility care. *Fertility and Sterility* 2010;94(4):1254-60. doi: <http://dx.doi.org/10.1016/j.fertnstert.2009.07.990>
12. Baird D, Barri P, Bhattacharya S, et al. Economic aspects of infertility care: a challenge for researchers and clinicians. *Human Reproduction* 2015:dev163.
13. Devlin N, Parkin D. Funding fertility: issues in the allocation and distribution of resources to assisted reproduction technologies. *Human Fertility* 2003;6(sup2):S2-S6.
14. Ryan M. Should government fund assisted reproductive techniques? A study using willingness to pay. *Applied Economics* 1997;29(7):841-49.
15. Connolly MP, Hoorens S, Chambers GM. The costs and consequences of assisted reproductive technology: an economic perspective. *Human reproduction update* 2010:dmq013.
16. van den Wijngaard L, Rodijk I, van der Veen F, et al. Patient preference for a long-acting recombinant Fsh product in ovarian hyperstimulation in Ivf: a discrete choice experiment. *Human reproduction (oxford, England)* 2015;30(2):331-37.

17. Johnston RJ, Boyle KJ, Adamowicz W, et al. Contemporary Guidance for Stated Preference Studies. *Journal of the Association of Environmental and Resource Economists* 2017;4(2):319-405. doi: doi:10.1086/691697
18. Scotland G, McLernon D, Kurinczuk J, et al. Minimising twins in in vitro fertilisation: a modelling study assessing the costs, consequences and cost–utility of elective single versus double embryo transfer over a 20-year time horizon. *BJOG: An International Journal of Obstetrics & Gynaecology* 2011;118(9):1073-83.
19. Ratcliffe J. The economics of the IVF programme: a critical review: National Centre for Health Program Evaluation 1992.
20. Goldhaber-Fiebert JD, Brandeau ML. Evaluating cost-effectiveness of interventions that affect fertility and childbearing: how health effects are measured matters. *Medical Decision Making* 2015;35(7):818-46.
21. Versteegh M, Brouwer W. Patient and general public preferences for health states: a call to reconsider current guidelines. *Social Science & Medicine* 2016;165:66-74.
22. Dolan P, Edlin R. Is it really possible to build a bridge between cost-benefit analysis and cost-effectiveness analysis? *Journal of Health Economics* 2002;21(5):827-43.
23. Ryan M. Using conjoint analysis to take account of patient preferences and go beyond health outcomes: an application to in vitro fertilisation. *Social Science & Medicine* 1999;48(4):535-46. doi: [http://dx.doi.org/10.1016/S0277-9536\(98\)00374-8](http://dx.doi.org/10.1016/S0277-9536(98)00374-8)
24. Musters AM, de Bekker-Grob EW, Mochtar MH, et al. Women's perspectives regarding subcutaneous injections, costs and live birth rates in IVF. *Human reproduction* 2011;26(9):2425-31.
25. Tockhorn-Heidenreich A, Ryan M, Hernández R. Discrete Choice Experiments. In: Facey KM, Ploug Hansen H, Single ANV, eds. *Patient Involvement in Health Technology Assessment*. Singapore: Springer Singapore 2017:121-33.
26. Lancaster KJ. A new approach to consumer theory. *The journal of political economy* 1966;74(2):132-57.
27. McFadden D. Conditional logit analysis of qualitative choice behavior. *Frontiers of econometrics* 1974(Zarembka P Edition):105-42.
28. Ryan M, Gerard K, Amaya-Amaya M. Discrete Choice Experiments in a Nutshell. In: Ryan M, Gerard K, Amaya-Amaya M, eds. *Using Discrete Choice Experiments to Value Health and Health Care*: Springer Netherlands 2008:13-46.
29. Hanley N, Wright RE, Alvarez-Farizo B. Estimating the economic value of improvements in river ecology using choice experiments: an application to the water framework directive. *Journal of Environmental Management* 2006;78(2):183-93. doi: <http://dx.doi.org/10.1016/j.jenvman.2005.05.001>
30. Spinks J, Chaboyer W, Bucknall T, et al. Patient and nurse preferences for nurse handover—using preferences to inform policy: a discrete choice experiment protocol. *BMJ open* 2015;5(11):e008941.
31. Goossens LM, Utens CM, Smeenk FW, et al. Should I stay or should I go home? A latent class analysis of a discrete choice experiment on hospital-at-home. *Value in Health* 2014;17(5):588-96.
32. Lancsar E, Fiebig DG, Hole AR. Discrete Choice Experiments: A Guide to Model Specification, Estimation and Software. *PharmacoEconomics* 2017:1-20.
33. Ryan M, Kolstad J, Rockers P, et al. How to conduct a Discrete Choice Experiment for health workforce recruitment and retention in remote and rural areas: a user guide with case studies. CapacityPlus World Bank and World Health Organization 2012.
34. McIntosh E, Clarke P, Frew E, et al. *Applied Methods of Cost-Benefit Analysis in Health Care*: Oxford University Press, 2010.

- 1
  - 2
  - 3
  - 4
  - 5
  - 6
  - 7
  - 8
  - 9
  - 10
  - 11
  - 12
  - 13
  - 14
  - 15
  - 16
  - 17
  - 18
  - 19
  - 20
  - 21
  - 22
  - 23
  - 24
  - 25
  - 26
  - 27
  - 28
  - 29
  - 30
  - 31
  - 32
  - 33
  - 34
  - 35
  - 36
  - 37
  - 38
  - 39
  - 40
  - 41
  - 42
  - 43
  - 44
  - 45
  - 46
  - 47
  - 48
  - 49
  - 50
  - 51
  - 52
  - 53
  - 54
  - 55
  - 56
  - 57
  - 58
  - 59
  - 60
35. Lancsar E, Louviere J. Conducting Discrete Choice Experiments to Inform Healthcare Decision Making. *PharmacoEconomics* 2008;26(8):661-77.
36. Kløjgaard ME, Bech M, Sjøgaard R. Designing a Stated Choice Experiment: The Value of a Qualitative Process. *Journal of Choice Modelling* 2012;5(2):1-18. doi: [http://dx.doi.org/10.1016/S1755-5345\(13\)70050-2](http://dx.doi.org/10.1016/S1755-5345(13)70050-2)
37. Louviere JJ, Hensher DA, Swait JD. Stated choice methods: analysis and applications: Cambridge University Press 2000.
38. Coast J, Al-Janabi H, Sutton EJ, et al. Using qualitative methods for attribute development for discrete choice experiments: issues and recommendations. *Health Economics* 2012;21(6):730-41. doi: 10.1002/hec.1739
39. Guttman R, Castle R, Fiebig DG. Use of discrete choice experiments in health economics: An update of the literature. CHERE WORKING PAPER 2009/2 2009.
40. Kragt ME. Evidence-based Research in Environmental Choice Experiments. Working Paper 1310. Australia: School of Agricultural and Resource Economics, University of Western Australia, 2013.
41. Bridges JFP, Hauber AB, Marshall D, et al. Conjoint Analysis Applications in Health—a Checklist: A Report of the ISPOR Good Research Practices for Conjoint Analysis Task Force. *Value in Health* 2011;14(4):403-13. doi: <http://dx.doi.org/10.1016/j.jval.2010.11.013>
42. Hilgsmann M, van Durme C, Geusens P, et al. Nominal group technique to select attributes for discrete choice experiments: an example for drug treatment choice in osteoporosis. *Patient preference and adherence* 2013;7:133.
43. Vass C, Rigby D, Payne K. The Role of Qualitative Research Methods in Discrete Choice Experiments. *Medical Decision Making* 2017:0272989X16683934. doi: 10.1177/0272989X16683934
44. Harvey N, Holmes CA. Nominal group technique: An effective method for obtaining group consensus. *International Journal of Nursing Practice* 2012;18(2):188-94. doi: 10.1111/j.1440-172X.2012.02017.x
45. Kremer IEH, Evers SMAA, Jongen PJ, et al. Identification and Prioritization of Important Attributes of Disease-Modifying Drugs in Decision Making among Patients with Multiple Sclerosis: A Nominal Group Technique and Best-Worst Scaling. *PLOS ONE* 2016;11(11):e0164862. doi: 10.1371/journal.pone.0164862
46. McMillan SS, King M, Tully MP. How to use the nominal group and Delphi techniques. *International journal of clinical pharmacy* 2016;38(3):655-62.
47. Carlsson F. Non-Market Valuation: Stated Preference Methods: Oxford University Press' 2011.
48. Greiner R, Bliemer M, Ballweg J. Design considerations of a choice experiment to estimate likely participation by north Australian pastoralists in contractual biodiversity conservation. *Journal of Choice Modelling* 2014;10:34-45.
49. Ryan M, Gerard K, Watson V, et al. Practical Issues in Conducting a Discrete Choice Experiment. In: Ryan M, Gerard K, Amaya-Amaya M, eds. Using Discrete Choice Experiments to Value Health and Health Care: Springer Netherlands 2008:73-97.
50. Hensher DA, Rose JM, Greene WH. Applied Choice Analysis. Second ed. United Kingdom: Cambridge University Press 2015.
51. van Empel IWH, Dancet EAF, Koolman XHE, et al. Physicians underestimate the importance of patient-centredness to patients: a discrete choice experiment in fertility care. *Human Reproduction* 2011;26(3):584-93. doi: 10.1093/humrep/deq389
52. Dancet EAF, Nelen WLDM, Sermeus W, et al. The patients' perspective on fertility care: a systematic review. *Human Reproduction Update* 2010;16(5):467-87. doi: 10.1093/humupd/dmq004



- 1  
2  
3 53. Palumbo A, De La Fuente P, Rodríguez M, et al. Willingness to pay and conjoint analysis  
4 to determine women's preferences for ovarian stimulating hormones in the treatment  
5 of infertility in Spain. *Human reproduction* 2011:der139.
- 6 54. Porter R, Kissel C, Saunders H, et al. Patient and nurse evaluation of recombinant human  
7 follicle-stimulating hormone administration methods: comparison of two follitropin  
8 injection pens. *Current Medical Research and Opinion* 2008;24(3):727-35. doi:  
9 10.1185/030079908X273291
- 10 55. Dancet EAF, D'Hooghe TM, Spiessens C, et al. Quality indicators for all dimensions of  
11 infertility care quality: consensus between professionals and patients. *Human*  
12 *Reproduction* 2013;28(6):1584-97. doi: 10.1093/humrep/det056
- 13 56. Pfarr C, Schmid A, Schneider U. Using Discrete Choice Experiments to Understand  
14 Preferences in Health Care. *Health Care Provision and Patient Mobility: Health*  
15 *Integration in the European Union* 2014:27-48.
- 16 57. Kjær T. A review of the discrete choice experiment-with emphasis on its application in  
17 health care: Syddansk Universitet Denmark 2005.
- 18 58. Rose JM, Bliemer MC. Constructing efficient stated choice experimental designs.  
19 *Transport Reviews* 2009;29(5):587-617.
- 20 59. Lloyd AJ. Threats to the estimation of benefit: are preference elicitation methods  
21 accurate? *Health economics* 2003;12(5):393-402.
- 22 60. de Bekker-Grob EW, Ryan M, Gerard K. Discrete choice experiments in health  
23 economics: a review of the literature. *Health Economics* 2012;21(2):145-72. doi:  
24 10.1002/hec.1697
- 25 61. Domínguez-Torreiro M. Alternative experimental design paradigms in choice  
26 experiments and their effects on consumer demand estimates for beef from  
27 endangered local cattle breeds: An empirical test. *Food Quality and Preference*  
28 2014;35:15-23.
- 29 62. Hauber AB, González JM, Groothuis-Oudshoorn CG, et al. Statistical Methods for the  
30 Analysis of Discrete Choice Experiments: A Report of the ISPOR Conjoint Analysis  
31 Good Research Practices Task Force. *Value in Health* 2016
- 32 63. Doherty E, Campbell D, Hynes S, et al. Examining labelling effects within discrete  
33 choice experiments: An application to recreational site choice. *Journal of*  
34 *Environmental Management* 2013;125(0):94-104. doi:  
35 <http://dx.doi.org/10.1016/j.jenvman.2013.03.056>
- 36 64. Hoyos D. The state of the art of environmental valuation with discrete choice  
37 experiments. *Ecological Economics* 2010;69(8):1595-603. doi:  
38 10.1016/j.ecolecon.2010.04.011
- 39 65. Huber J, Zwerina K. The importance of utility balance in efficient choice designs. *Journal*  
40 *of Marketing research* 1996:307-17.
- 41 66. Choicemetrics. Ngene 1.1.2: User manual and reference guide: Choice Metrics Pty Ltd,  
42 2014.
- 43 67. Ryan M, Major K, Skåtun D. Using discrete choice experiments to go beyond clinical  
44 outcomes when evaluating clinical practice. *Journal of evaluation in clinical practice*  
45 2005;11(4):328-38.
- 46 68. Carlsson F, Mørkbak MR, Olsen SB. The first time is the hardest: A test of ordering  
47 effects in choice experiments. *Journal of Choice Modelling* 2012;5(2):19-37. doi:  
48 [http://dx.doi.org/10.1016/S1755-5345\(13\)70051-4](http://dx.doi.org/10.1016/S1755-5345(13)70051-4)
- 49 69. Efficiency benefits of choice model experimental design updating: a case study. 2009  
50 Conference (53rd), February 11-13, 2009, Cairns, Australia; 2009. Australian  
51 Agricultural and Resource Economics Society.
- 52  
53  
54  
55  
56  
57  
58  
59  
60

- 1  
2  
3 70. Orme B. Getting Started with Conjoint Analysis: Strategies for Product Design and  
4 Pricing Research Madison. *Wisconsin: Research Publishers* 2006  
5 71. de Bekker-Grob E, Donkers B, Jonker M, et al. Sample Size Requirements for Discrete-  
6 Choice Experiments in Healthcare: a Practical Guide. *The Patient - Patient-Centered*  
7 *Outcomes Research* 2015;1-12. doi: 10.1007/s40271-015-0118-z  
8 72. de Bekker-Grob E, Bliemer M, Donkers B, et al. Patients' and urologists' preferences for  
9 prostate cancer treatment: a discrete choice experiment. *British journal of cancer*  
10 2013;109(3):633-40.  
11  
12  
13  
14  
15  
16  
17  
18

19 **Figure 1: A flowchart of activities**  
20  
21  
22  
23  
24  
25  
26  
27  
28  
29  
30  
31  
32  
33  
34  
35  
36  
37  
38  
39  
40  
41  
42  
43  
44  
45  
46  
47  
48  
49  
50  
51  
52  
53  
54  
55  
56  
57  
58  
59  
60

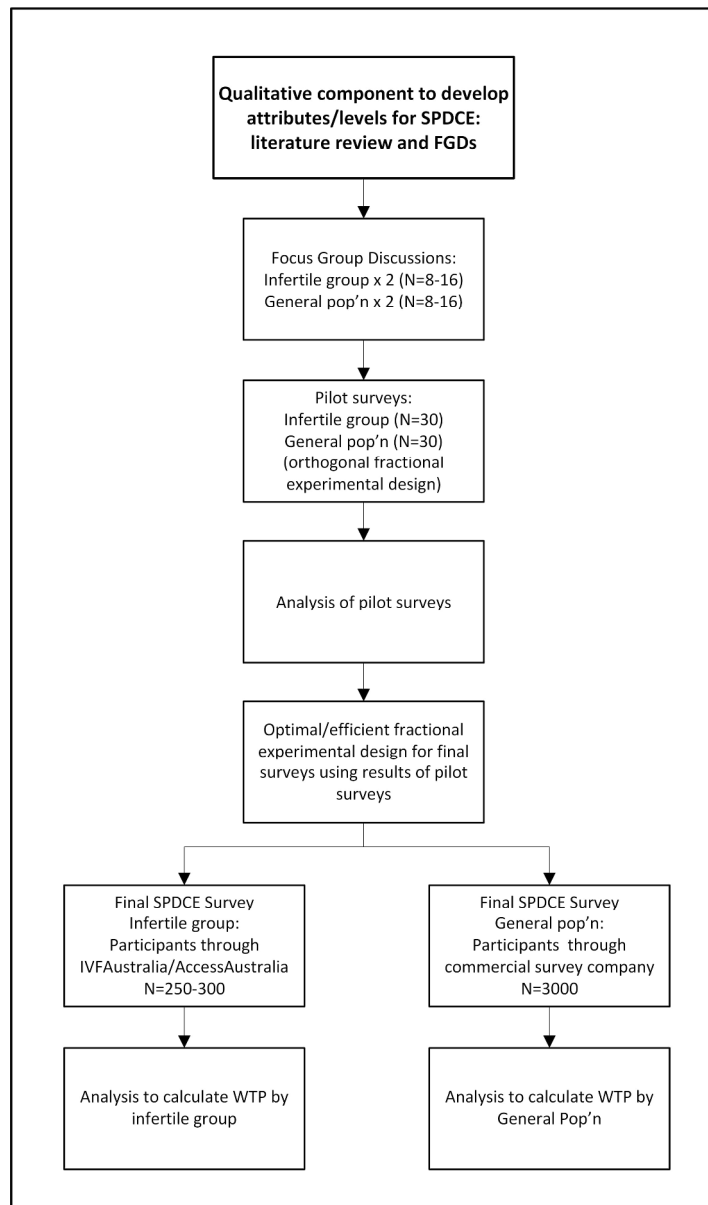

Figure 1: A flowchart of activities

220x374mm (300 x 300 DPI)
